# Supplementary material for: Atom-dispersed Au combined with nano-Au on halloysite nanotubes with closo-dodecaborate promotes synergistic effects for enhanced photocatalysis
Source: Royal Society of Chemistry journal article supplement (doi:10.1039/d2ta07827a), 2022-11-28
Supplement: d2ta07827a1.pdf [file d2ta07827a1.pdf]

## Supporting Information

**Atom-dispersed Au combined with Nano-Au on Halloysite Nanotubes with Closo-dodecaborate promotes Synergistic Effects for Enhanced Photocatalysis**

---

## Table on content

|                                                                                                                                                                                                                                                                                                                                                                                                                                                                                                                                                                                                        |    |
|--------------------------------------------------------------------------------------------------------------------------------------------------------------------------------------------------------------------------------------------------------------------------------------------------------------------------------------------------------------------------------------------------------------------------------------------------------------------------------------------------------------------------------------------------------------------------------------------------------|----|
| Results and Discussion.....                                                                                                                                                                                                                                                                                                                                                                                                                                                                                                                                                                            | 4  |
| Figure S1. FT-IR spectra of HNT@B <sub>12</sub> H <sub>12</sub> @Au (a); PXRD spectra of HNT@B <sub>12</sub> H <sub>12</sub> @Au (b); XPS spectra of HNT@B <sub>12</sub> H <sub>12</sub> @Au (c, d); and XPS spectra of B before (e) and after (f) Au reduction. ....                                                                                                                                                                                                                                                                                                                                  | 4  |
| Figure S2. TEM of Na <sub>2</sub> B <sub>12</sub> H <sub>12</sub> @Au. ....                                                                                                                                                                                                                                                                                                                                                                                                                                                                                                                            | 4  |
| Figure S3. XPS spectra of HNT@Au.....                                                                                                                                                                                                                                                                                                                                                                                                                                                                                                                                                                  | 4  |
| Table S1. pH values before and after reaction and the effect of different solvents on the reducibility of Na <sub>2</sub> B <sub>12</sub> H <sub>12</sub> . ....                                                                                                                                                                                                                                                                                                                                                                                                                                       | 5  |
| Table S2. Catalytic effect of different catalysts on different substrates <sup>[a]</sup> . ....                                                                                                                                                                                                                                                                                                                                                                                                                                                                                                        | 5  |
| Table S3. Comparison of HNT@B <sub>12</sub> H <sub>12</sub> @Au with reported solid catalysts for the reduction of nitrobenzene to AB. ....                                                                                                                                                                                                                                                                                                                                                                                                                                                            | 5  |
| Figure S4. EPR spectra of the Na <sub>2</sub> B <sub>12</sub> H <sub>12</sub> reduction of Au NPs from 0 to 60 min; 2, 2-dimethyl-3,4-dihydro-2H-pyrrole 1-oxide (DMPO) was added in each period (0, 1, 2, 3, 4, and 60 min).....                                                                                                                                                                                                                                                                                                                                                                      | 5  |
| Figure S5. LTQ-XL mass spectrometry of B <sub>12</sub> H <sub>12</sub> <sup>2-</sup> before and after reaction (a, b). The detailed <i>m/z</i> after the reaction is shown in (c), and the proposed mechanism for Au-NP synthesis by B <sub>12</sub> H <sub>12</sub> <sup>2-</sup> is summarized in (1–3). The <i>m/z</i> of B <sub>12</sub> H <sub>12</sub> <sup>2-</sup> derivatives are shown in (3) (because the eluent is acetonitrile, 1–2 molecular weights of acetonitrile should be added when calculating the <i>m/z</i> of B <sub>12</sub> H <sub>12</sub> <sup>2-</sup> derivatives). .... | 6  |
| Figure S6. UV-vis spectrometry of HNT@B <sub>12</sub> H <sub>12</sub> @Au and Na <sub>2</sub> B <sub>12</sub> H <sub>12</sub> @Au (a). The photocurrent density ( <i>I-t</i> curves) of different materials under UV radiation at 370 nm wavelength (b). ....                                                                                                                                                                                                                                                                                                                                          | 6  |
| Figure S7. Effect of irradiation density (power) on reaction (The irradiation density corresponding to 25W is 0.54 W/cm <sup>2</sup> )...                                                                                                                                                                                                                                                                                                                                                                                                                                                              | 7  |
| Figure S8. Isolation yields of azobenzene at different irradiation densities. ....                                                                                                                                                                                                                                                                                                                                                                                                                                                                                                                     | 7  |
| Figure S9. Models of Au-Al-Osite. ....                                                                                                                                                                                                                                                                                                                                                                                                                                                                                                                                                                 | 8  |
| Figure S10. Models of Au-B-Al-Osite. ....                                                                                                                                                                                                                                                                                                                                                                                                                                                                                                                                                              | 8  |
| Figure S11. Models of Au-B-Osite. ....                                                                                                                                                                                                                                                                                                                                                                                                                                                                                                                                                                 | 8  |
| Figure S12. Models of Au-NP site. ....                                                                                                                                                                                                                                                                                                                                                                                                                                                                                                                                                                 | 9  |
| Figure S13. Isodensity contour plot of the Fukui function <i>f</i> (+), <i>f</i> (0), <i>f</i> (-) and delta <i>f</i> for NB.....                                                                                                                                                                                                                                                                                                                                                                                                                                                                      | 9  |
| Figure S14. Isodensity contour plot of the Fukui function <i>f</i> (+), <i>f</i> (0), <i>f</i> (-) and delta <i>f</i> for the nitrosobenzene (NSB).....                                                                                                                                                                                                                                                                                                                                                                                                                                                | 9  |
| Figure S15. Isodensity contour plot of the Fukui function <i>f</i> (+), <i>f</i> (0), <i>f</i> (-) and delta <i>f</i> for the di-nitrosobenzene (D-NSB). ....                                                                                                                                                                                                                                                                                                                                                                                                                                          | 10 |
| Figure S16. Isodensity contour plot of the Fukui function <i>f</i> (+), <i>f</i> (0), <i>f</i> (-) and delta <i>f</i> for the hydrogenated NSB (NSB-H). .                                                                                                                                                                                                                                                                                                                                                                                                                                              | 10 |
| Figure S17. Isodensity contour plot of the Fukui function <i>f</i> (+), <i>f</i> (0), <i>f</i> (-) and delta <i>f</i> for the azoxybenzene (AOB).....                                                                                                                                                                                                                                                                                                                                                                                                                                                  | 10 |
| Figure S18. Isodensity contour plot of the Fukui function <i>f</i> (+), <i>f</i> (0), <i>f</i> (-) and delta <i>f</i> for the azobenzene (AB).....                                                                                                                                                                                                                                                                                                                                                                                                                                                     | 11 |
| Table S4. Mulliken atomic charges of nitrobenzene (NB), azobenzene (AB) and azoxybenzene (AOB) have been calculated using GGA-PBE. ....                                                                                                                                                                                                                                                                                                                                                                                                                                                                | 11 |
| Figure S20. (a) Reusability of HNT@B <sub>12</sub> H <sub>12</sub> @Au (conversions and selectivity are based on GC), (b) PXRD of recycled HNT@B <sub>12</sub> H <sub>12</sub> @Au after seven cycles, (c) HRTEM of recycled HNT@B <sub>12</sub> H <sub>12</sub> @Au after seven cycles, (d) HAADF-STEM image of HNT@B <sub>12</sub> H <sub>12</sub> @Au after 7th use, and representative B, Au, Al, Si elemental mapping of (e), (f) XPS spectra of Au on the recycled HNT@B <sub>12</sub> H <sub>12</sub> @Au. ....                                                                                 | 13 |
| Spectroscopic characterizations of the azo products .....                                                                                                                                                                                                                                                                                                                                                                                                                                                                                                                                              | 14 |
| References .....                                                                                                                                                                                                                                                                                                                                                                                                                                                                                                                                                                                       | 37 |

---

## **Results and Discussion**

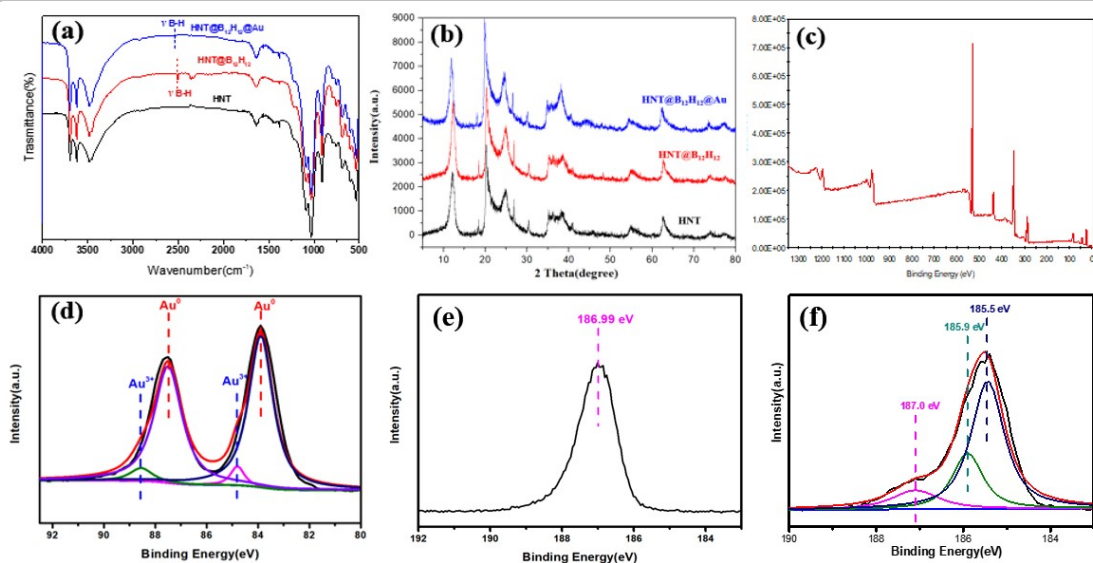

**Figure S1.** FT-IR spectra of HNT@B<sub>12</sub>H<sub>12</sub>@Au (a); PXRD spectra of HNT@B<sub>12</sub>H<sub>12</sub>@Au (b); XPS spectra of HNT@B<sub>12</sub>H<sub>12</sub>@Au (c, d); and XPS spectra of B before (e) and after (f) Au reduction.

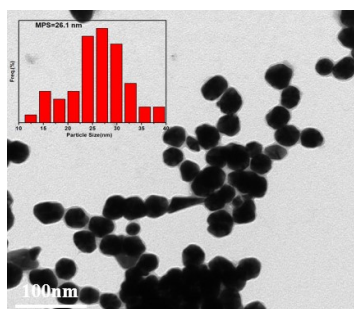

**Figure S2.** TEM of Na<sub>2</sub>B<sub>12</sub>H<sub>12</sub>@Au.

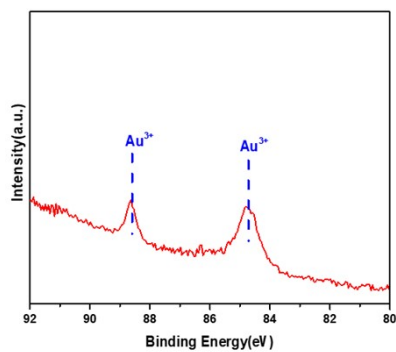

**Figure S3.** XPS spectra of HNT@Au.

**Table S1.** pH values before and after reaction and the effect of different solvents on the reducibility of Na<sub>2</sub>B<sub>12</sub>H<sub>12</sub>.

| Entry | Na <sub>2</sub> B <sub>12</sub> H <sub>12</sub> | NaAuCl <sub>4</sub> | Solvent                                 | Time   | Solution color | pH   |
|-------|-------------------------------------------------|---------------------|-----------------------------------------|--------|----------------|------|
| 1     | -                                               | 0.1mmol             | H <sub>2</sub> O(30 mL)                 | 10 min | yellow         | 3.63 |
| 2     | 0.5mmol                                         | -                   | H <sub>2</sub> O(30 mL)                 | 10 min | colorless      | 7.02 |
| 3     | 0.5mmol                                         | 0.1mmol             | H <sub>2</sub> O(30 mL)                 | 10 min | purple black   | 3.11 |
| 4     | 0.5mmol                                         | 0.1mmol             | MeOH(30 mL)                             | 10 min | yellow         | -    |
| 5     | 0.5mmol                                         | 0.1mmol             | EtOH(30 mL)                             | 10 min | yellow         | -    |
| 6     | 0.5mmol                                         | 0.1mmol             | CH <sub>2</sub> Cl <sub>2</sub> (30 mL) | 10 min | yellow         | -    |
| 7     | 0.5mmol                                         | 0.1mmol             | Acetone(30 mL)                          | 10 min | yellow         | -    |
| 8     | 0.5mmol                                         | 0.1mmol             | DMF(30 mL)                              | 10 min | yellow         | -    |

**Table S2.** Catalytic effect of different catalysts on different substrates<sup>[a]</sup>.

| Entry | Reactant | Catalyst                                            | Yield(%) of AOB at different Reactin time <sup>[b]</sup> |      |     |      |    |      | Yield(%) of AB at different Reactin time <sup>[b]</sup> |      |     |      |     |      |
|-------|----------|-----------------------------------------------------|----------------------------------------------------------|------|-----|------|----|------|---------------------------------------------------------|------|-----|------|-----|------|
|       |          |                                                     | 0 h                                                      | 0.5h | 1h  | 1.5h | 2h | 2.5h | 0 h                                                     | 0.5h | 1h  | 1.5h | 2h  | 2.5h |
| 1     | NB       | HNT@Au                                              | -                                                        | 4.0  | 7.2 | 9.4  | 14 | 12   | -                                                       | 4.2  | 5.1 | 5.4  | 5.8 | 6.4  |
| 2     | NB       | Na <sub>2</sub> B <sub>12</sub> H <sub>12</sub> @Au | -                                                        | 10   | 22  | 69   | 40 | 4.2  | -                                                       | -    | -   | 15   | 38  | 63   |
| 3     | NB       | HNT@B <sub>12</sub> H <sub>12</sub> @Au             | -                                                        | 18   | 29  | 48   | 28 | -    | -                                                       | 8.1  | 12  | 37   | 69  | 97   |
| 4     | NSB      | HNT@Au                                              | -                                                        | 24   | 49  | 58   | 41 | -    | -                                                       | 5.7  | 9.2 | 14   | 19  | 28   |
| 5     | NSB      | Na <sub>2</sub> B <sub>12</sub> H <sub>12</sub> @Au | -                                                        | 9.9  | 14  | 31   | 44 | -    | -                                                       | 3.2  | 8.5 | 21   | 39  | 57   |
| 6     | NSB      | HNT@B <sub>12</sub> H <sub>12</sub> @Au             | -                                                        | 31   | 52  | 42   | 28 | 3.9  | -                                                       | 8.4  | 17  | 45   | 71  | 98   |
| 7     | AOB      | HNT@Au                                              | -                                                        | -    | -   | -    | -  | -    | -                                                       | 12   | 19  | 24   | 31  | 37   |
| 8     | AOB      | Na <sub>2</sub> B <sub>12</sub> H <sub>12</sub> @Au | -                                                        | -    | -   | -    | -  | -    | -                                                       | 17   | 29  | 37   | 46  | 54   |
| 9     | AOB      | HNT@B <sub>12</sub> H <sub>12</sub> @Au             | -                                                        | -    | -   | -    | -  | -    | -                                                       | 25   | 42  | 68   | 82  | 98   |

[a] Reaction condition: reactant 0.5 mmol, photocatalyst 0.5  $\mu$ mol (base on Au), 5 mL 2-propanol as solvent, 0.75 mmol NaOH as base, 1 atm N<sub>2</sub> atmosphere, room temperature, reaction time from 0-2.5 h, and the light ( $\approx$ 370 nm) intensity was 0.54 W/cm<sup>2</sup>. [b] The conversions were analyzed by gas chromatography (GC).

**Table S3.** Comparison of HNT@B<sub>12</sub>H<sub>12</sub>@Au with reported solid catalysts for the reduction of nitrobenzene to AB.

| Catalyst                                            | Conditions                                              | TON    | TOF(h <sup>-1</sup> ) | Ref.      |
|-----------------------------------------------------|---------------------------------------------------------|--------|-----------------------|-----------|
| BM-Au/TiO <sub>2</sub>                              | 2-propanol, KOH, visible-light, 12h, R.T.               | 43.3   | 3.61                  | [1]       |
| Cu/graphene                                         | 2-propanol, KOH, 400-800 nm, 12 h, 90°C                 | 36.6   | 3.05                  | [2]       |
| g-C <sub>3</sub> N <sub>4</sub>                     | 2-propanol, KOH, 410 nm LED, 5h, R.T.                   | 0.0375 | 0.0075                | [3]       |
| Au@CeO <sub>2</sub>                                 | 2-propanol, KOH, 4h, 50°C                               | 12.4   | 3.09                  | [4]       |
| Au@OC1R                                             | 2-propanol, KOH, UV, 2h, 30°C                           | 182    | 91.0                  | [5]       |
| SmI <sub>2</sub>                                    | THF, n-Bu4NPF <sub>6</sub> , electrical drive, 2h, 20°C | 9.50   | 4.75                  | [6]       |
| Ag@ZrO <sub>2</sub>                                 | 2-propanol, KOH, UV, 2h, 60°C                           | 32.0   | 2.00                  | [7]       |
| Na <sub>2</sub> B <sub>12</sub> H <sub>12</sub> @Au | 2-propanol, KOH, 370nm, 2.5h, R.T.                      | 7.60   | 3.10                  | This work |
| HNT@B <sub>12</sub> H <sub>12</sub> @Au             | 2-propanol, KOH, 370nm, 2.5h, R.T.                      | 218    | 87.1                  | This work |

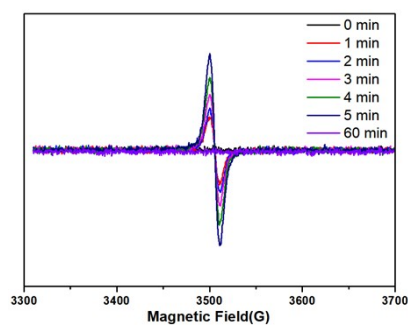

**Figure S4.** EPR spectra of the Na<sub>2</sub>B<sub>12</sub>H<sub>12</sub> reduction of Au NPs from 0 to 60 min; 2, 2-dimethyl-3,4-dihydro-2H-pyrrole 1-oxide (DMPO) was added in each period (0, 1, 2, 3, 4, and 60 min).

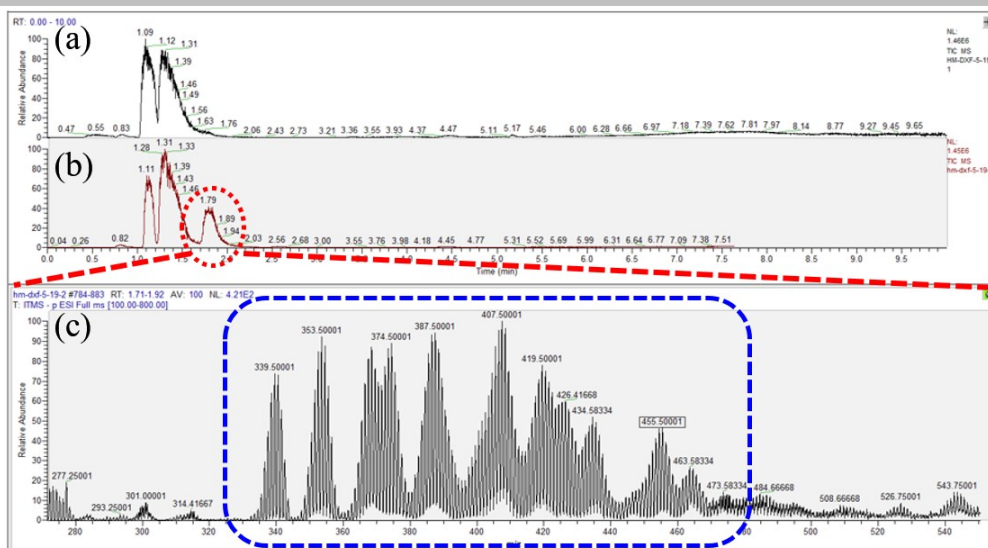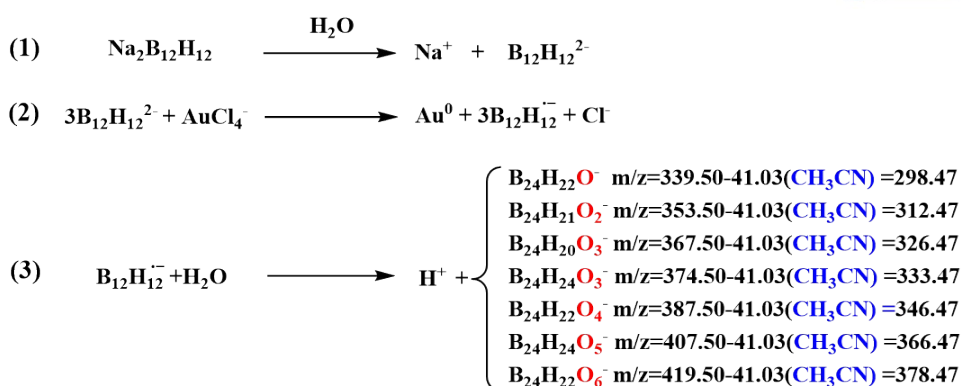

**Figure S5.** LTQ-XL mass spectrometry of  $\text{B}_{12}\text{H}_{12}^{2-}$  before and after reaction (a, b). The detailed  $m/z$  after the reaction is shown in (c), and the proposed mechanism for Au-NP synthesis by  $\text{B}_{12}\text{H}_{12}^{2-}$  is summarized in (1–3). The  $m/z$  of  $\text{B}_{12}\text{H}_{12}^{2-}$  derivatives are shown in (3) (because the eluent is acetonitrile, 1–2 molecular weights of acetonitrile should be added when calculating the  $m/z$  of  $\text{B}_{12}\text{H}_{12}^{2-}$  derivatives).

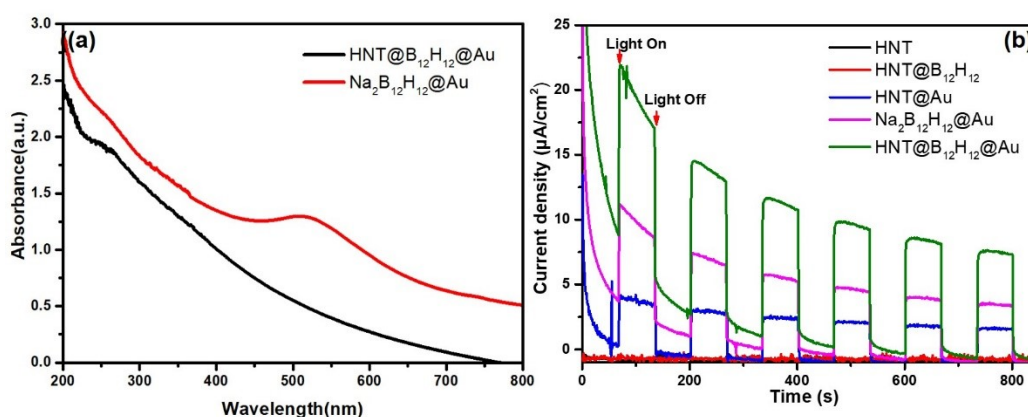

**Figure S6.** UV-vis spectrometry of  $\text{HNT@B}_{12}\text{H}_{12}@Au$  and  $\text{Na}_2\text{B}_{12}\text{H}_{12}@Au$  (a). The photocurrent density ( $I-t$  curves) of different materials under UV radiation at 370 nm wavelength (b).

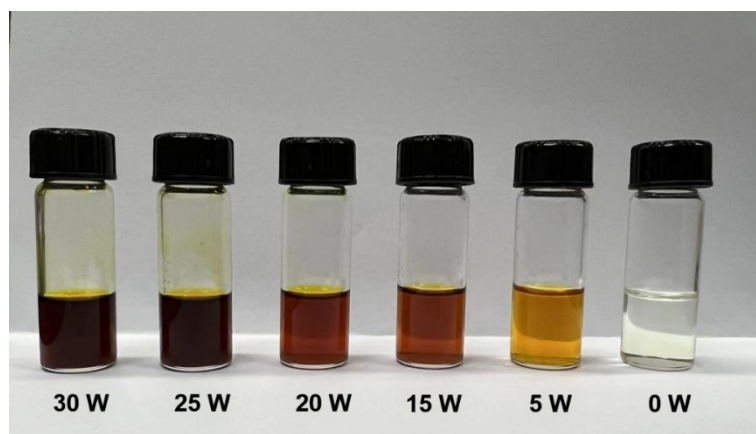

**Figure S7.** Effect of irradiation density (power) on reaction (The irradiation density corresponding to 25W is 0.54 W/cm<sup>2</sup>). Reaction condition: photocatalyst 100 mg, reactant 0.5 mmol, 5 mL 2-propanol as solvent, 0.75 mmol NaOH as base, 1 atm N<sub>2</sub> atmosphere, room temperature, reaction time 2.5 h, and the irradiation ( $\lambda \approx 370$  nm), 0, 5, 15, 20, 25 and 30W corresponds to the irradiation density of 0, 0.11, 0.32, 0.54 and 0.65 W/cm<sup>2</sup>.

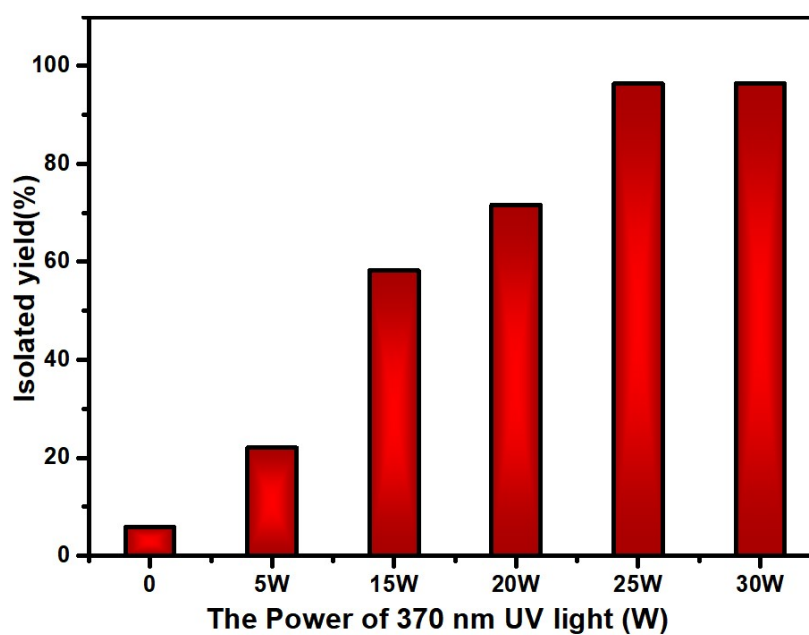

**Figure S8.** Isolation yields of azobenzene at different irradiation densities. Reaction condition: photocatalyst 100 mg, reactant 0.5 mmol, 5 mL 2-propanol as solvent, 0.75 mmol NaOH as base, 1 atm N<sub>2</sub> atmosphere, room temperature, reaction time 2.5 h, and the irradiation ( $\lambda \approx 370$  nm), 0, 5, 15, 20, 25 and 30W corresponds to the irradiation density of 0, 0.11, 0.32, 0.54 and 0.65 W/cm<sup>2</sup>.

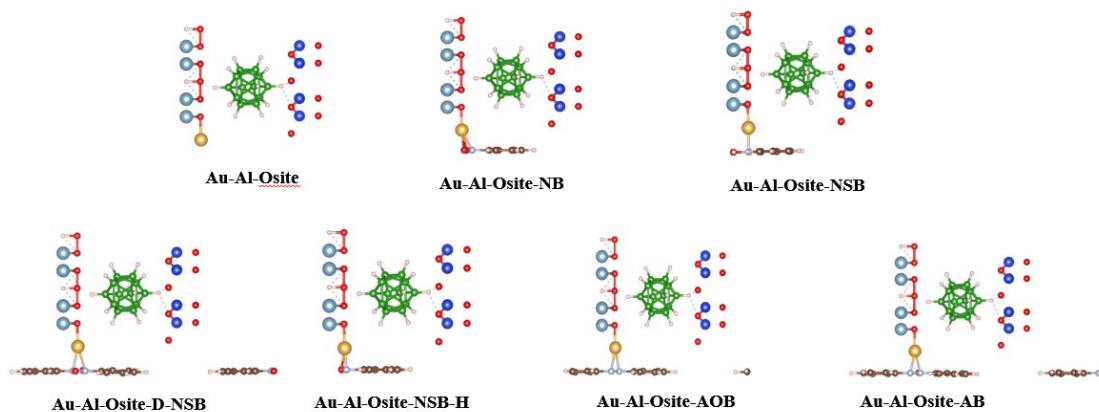

Figure S9. Models of Au-Al-Osite.

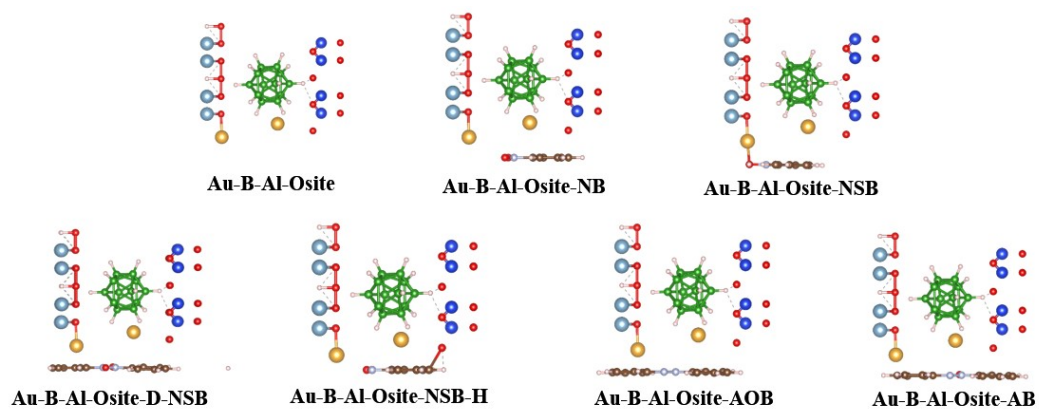

Figure S10. Models of Au-B-Al-Osite.

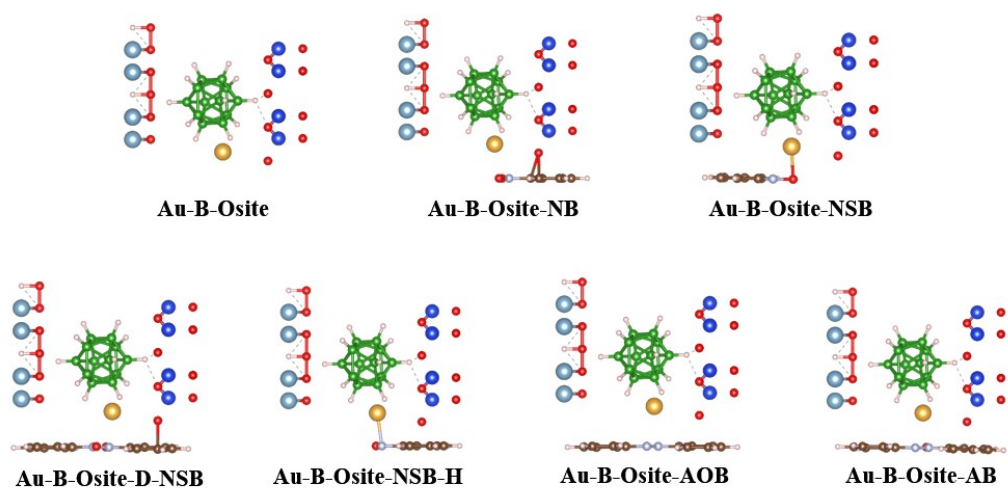

Figure S11. Models of Au-B-Osite.



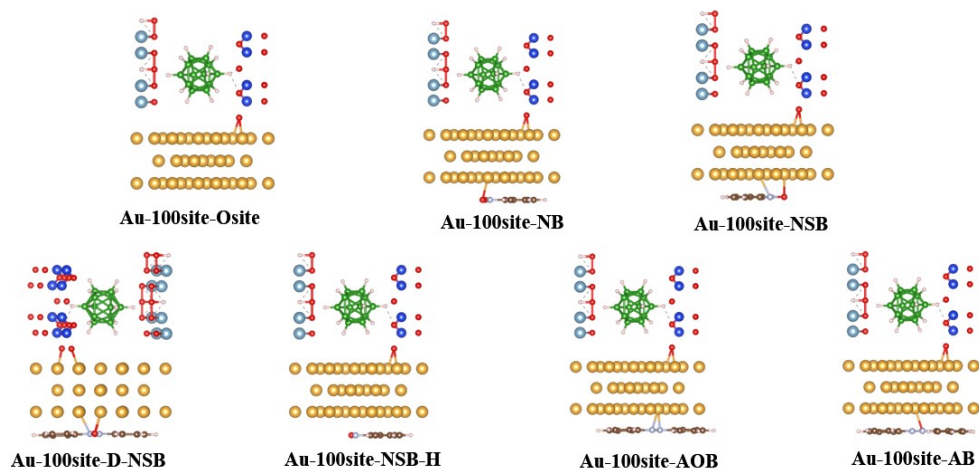

Figure S12. Models of Au-NP site.

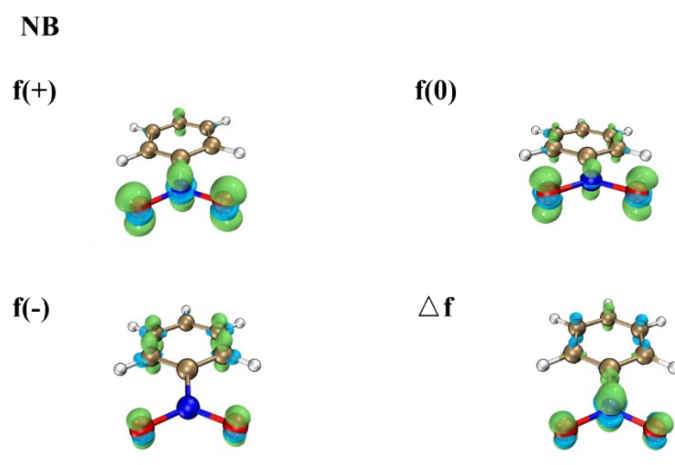

Figure S13. Isodensity contour plot of the Fukui function  $f(+)$ ,  $f(0)$ ,  $f(-)$  and  $\Delta f$  for NB.

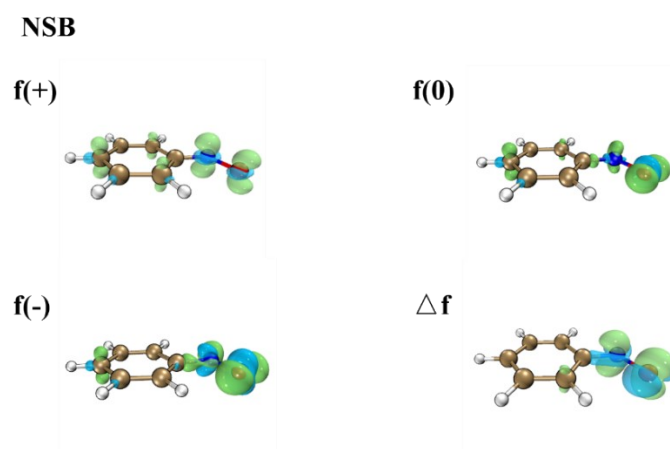

Figure S14. Isodensity contour plot of the Fukui function  $f(+)$ ,  $f(0)$ ,  $f(-)$  and  $\Delta f$  for the nitrosobenzene (NSB).

### D-NSB

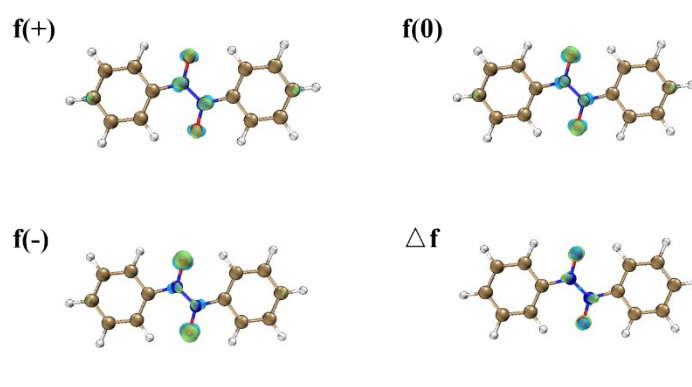

Figure S15. Isodensity contour plot of the Fukui function  $f(+)$ ,  $f(0)$ ,  $f(-)$  and  $\Delta f$  for the di-nitrosobenzene (D-NSB).

### NSB-H

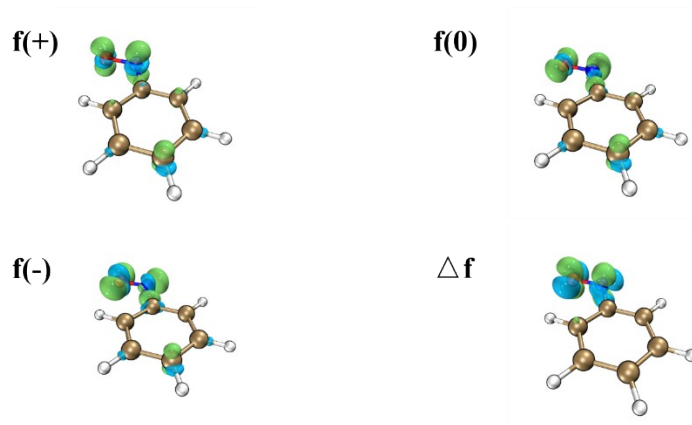

Figure S16. Isodensity contour plot of the Fukui function  $f(+)$ ,  $f(0)$ ,  $f(-)$  and  $\Delta f$  for the hydrogenated NSB (NSB-H).

### AOB

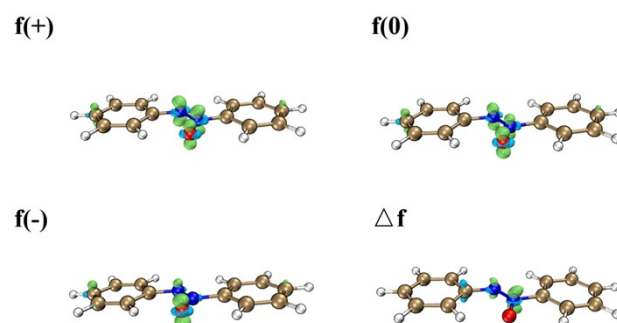

Figure S17. Isodensity contour plot of the Fukui function  $f(+)$ ,  $f(0)$ ,  $f(-)$  and  $\Delta f$  for the azoxybenzene (AOB).

**AB**

**f(+)**

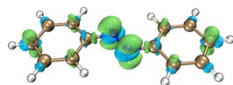

**f(0)**

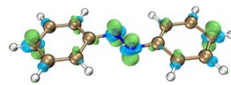

**f(-)**

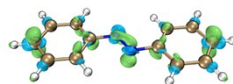

**Δf**

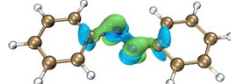

**Figure S18.** Isodensity contour plot of the Fukui function  $f(+)$ ,  $f(0)$ ,  $f(-)$  and  $\Delta f$  for the azobenzene (AB).

**Table S4.** Mulliken atomic charges of nitrobenzene (NB), azobenzene (AB) and azoxybenzene (AOB) have been calculated using GGA-PBE.

| Atomic Populations (Mulliken) of NB |     |      |      |      |      |      | Total | Charge(e) |
|-------------------------------------|-----|------|------|------|------|------|-------|-----------|
| Species                             | Ion | s    | p    | d    | f    |      |       |           |
| H                                   | 1   | 0.67 | 0.00 | 0.00 | 0.00 | 0.67 | 0.33  |           |
| H                                   | 2   | 0.66 | 0.00 | 0.00 | 0.00 | 0.66 | 0.34  |           |
| H                                   | 3   | 0.69 | 0.00 | 0.00 | 0.00 | 0.69 | 0.31  |           |
| H                                   | 4   | 0.69 | 0.00 | 0.00 | 0.00 | 0.69 | 0.31  |           |
| H                                   | 5   | 0.70 | 0.00 | 0.00 | 0.00 | 0.70 | 0.30  |           |
| C                                   | 1   | 1.26 | 3.00 | 0.00 | 0.00 | 4.26 | -0.26 |           |
| C                                   | 2   | 1.27 | 2.99 | 0.00 | 0.00 | 4.26 | -0.26 |           |
| C                                   | 3   | 1.26 | 3.02 | 0.00 | 0.00 | 4.27 | -0.27 |           |
| C                                   | 4   | 1.26 | 2.97 | 0.00 | 0.00 | 4.24 | -0.24 |           |
| C                                   | 5   | 1.13 | 2.76 | 0.00 | 0.00 | 3.89 | 0.11  |           |
| C                                   | 6   | 1.26 | 2.98 | 0.00 | 0.00 | 4.24 | -0.24 |           |
| N                                   | 1   | 1.48 | 3.28 | 0.00 | 0.00 | 4.76 | 0.24  |           |
| O                                   | 1   | 1.94 | 4.40 | 0.00 | 0.00 | 6.33 | -0.33 |           |
| O                                   | 2   | 1.94 | 4.39 | 0.00 | 0.00 | 6.33 | -0.33 |           |

| Atomic Populations (Mulliken) of NSB |     |      |      |      |      |      | Total | Charge(e) |
|--------------------------------------|-----|------|------|------|------|------|-------|-----------|
| Species                              | Ion | s    | p    | d    | f    |      |       |           |
| H                                    | 1   | 0.76 | 0.00 | 0.00 | 0.00 | 0.76 | 0.24  |           |
| H                                    | 2   | 0.68 | 0.00 | 0.00 | 0.00 | 0.68 | 0.32  |           |
| H                                    | 3   | 0.70 | 0.00 | 0.00 | 0.00 | 0.70 | 0.30  |           |
| H                                    | 4   | 0.70 | 0.00 | 0.00 | 0.00 | 0.70 | 0.30  |           |
| H                                    | 5   | 0.70 | 0.00 | 0.00 | 0.00 | 0.70 | 0.30  |           |
| H                                    | 6   | 0.49 | 0.00 | 0.00 | 0.00 | 0.49 | 0.51  |           |
| C                                    | 1   | 1.19 | 3.09 | 0.00 | 0.00 | 4.27 | -0.27 |           |
| C                                    | 2   | 1.19 | 3.10 | 0.00 | 0.00 | 4.29 | -0.29 |           |
| C                                    | 3   | 1.19 | 3.11 | 0.00 | 0.00 | 4.29 | -0.29 |           |
| C                                    | 4   | 1.19 | 3.08 | 0.00 | 0.00 | 4.27 | -0.27 |           |
| C                                    | 5   | 1.02 | 2.85 | 0.00 | 0.00 | 3.88 | 0.12  |           |
| C                                    | 6   | 1.16 | 3.16 | 0.00 | 0.00 | 4.33 | -0.33 |           |
| N                                    | 1   | 1.64 | 3.49 | 0.00 | 0.00 | 5.13 | -0.13 |           |
| O                                    | 1   | 1.83 | 4.68 | 0.00 | 0.00 | 6.51 | -0.51 |           |

| Atomic Populations (Mulliken) of D-NSB |     |      |      |      |      |      | Total | Charge(e) |
|----------------------------------------|-----|------|------|------|------|------|-------|-----------|
| Species                                | Ion | s    | p    | d    | f    |      |       |           |
| H                                      | 1   | 0.68 | 0.00 | 0.00 | 0.00 | 0.68 | 0.32  |           |
| H                                      | 2   | 0.68 | 0.00 | 0.00 | 0.00 | 0.68 | 0.32  |           |
| H                                      | 3   | 0.70 | 0.00 | 0.00 | 0.00 | 0.70 | 0.30  |           |
| H                                      | 4   | 0.71 | 0.00 | 0.00 | 0.00 | 0.71 | 0.29  |           |
| H                                      | 5   | 0.71 | 0.00 | 0.00 | 0.00 | 0.71 | 0.29  |           |
| H                                      | 6   | 0.69 | 0.00 | 0.00 | 0.00 | 0.69 | 0.31  |           |
| H                                      | 7   | 0.67 | 0.00 | 0.00 | 0.00 | 0.67 | 0.33  |           |
| H                                      | 8   | 0.71 | 0.00 | 0.00 | 0.00 | 0.71 | 0.29  |           |
| H                                      | 9   | 0.71 | 0.00 | 0.00 | 0.00 | 0.71 | 0.29  |           |
| H                                      | 10  | 0.71 | 0.00 | 0.00 | 0.00 | 0.71 | 0.29  |           |
| C                                      | 1   | 1.26 | 3.01 | 0.00 | 0.00 | 4.27 | -0.27 |           |
| C                                      | 2   | 1.26 | 3.01 | 0.00 | 0.00 | 4.27 | -0.27 |           |
| C                                      | 3   | 1.26 | 3.02 | 0.00 | 0.00 | 4.28 | -0.28 |           |
| C                                      | 4   | 1.26 | 3.00 | 0.00 | 0.00 | 4.26 | -0.26 |           |
| C                                      | 5   | 1.12 | 2.76 | 0.00 | 0.00 | 3.88 | 0.12  |           |
| C                                      | 6   | 1.25 | 3.00 | 0.00 | 0.00 | 4.25 | -0.25 |           |
| C                                      | 7   | 1.26 | 3.01 | 0.00 | 0.00 | 4.27 | -0.27 |           |

|   |    |      |      |      |      |      |       |
|---|----|------|------|------|------|------|-------|
| C | 8  | 1.26 | 3.01 | 0.00 | 0.00 | 4.27 | -0.27 |
| C | 9  | 1.26 | 3.03 | 0.00 | 0.00 | 4.28 | -0.28 |
| C | 10 | 1.26 | 2.99 | 0.00 | 0.00 | 4.25 | -0.25 |
| C | 11 | 1.26 | 3.01 | 0.00 | 0.00 | 3.88 | 0.12  |
| C | 12 | 1.25 | 2.99 | 0.00 | 0.00 | 4.25 | -0.25 |
| N | 1  | 1.41 | 3.46 | 0.00 | 0.00 | 4.88 | 0.12  |
| N | 2  | 1.39 | 3.45 | 0.00 | 0.00 | 4.84 | 0.16  |
| O | 1  | 1.93 | 4.54 | 0.00 | 0.00 | 6.47 | -0.47 |
| O | 2  | 1.90 | 4.54 | 0.00 | 0.00 | 6.45 | -0.45 |

Atomic Populations (Mulliken) of NSB-H

| Species | Ion | s    | p    | d    | f    | Total | Charge(e) |
|---------|-----|------|------|------|------|-------|-----------|
| H       | 1   | 0.68 | 0.00 | 0.00 | 0.00 | 0.68  | 0.32      |
| H       | 2   | 0.68 | 0.00 | 0.00 | 0.00 | 0.68  | 0.32      |
| H       | 3   | 0.69 | 0.00 | 0.00 | 0.00 | 0.69  | 0.31      |
| H       | 4   | 0.69 | 0.00 | 0.00 | 0.00 | 0.69  | 0.31      |
| H       | 5   | 0.69 | 0.00 | 0.00 | 0.00 | 0.69  | 0.31      |
| C       | 1   | 1.19 | 3.10 | 0.00 | 0.00 | 4.29  | -0.29     |
| C       | 2   | 1.20 | 3.07 | 0.00 | 0.00 | 4.27  | -0.27     |
| C       | 3   | 1.19 | 3.09 | 0.00 | 0.00 | 4.28  | -0.28     |
| C       | 4   | 1.19 | 3.09 | 0.00 | 0.00 | 4.28  | -0.28     |
| C       | 5   | 1.05 | 2.83 | 0.00 | 0.00 | 3.88  | 0.12      |
| C       | 6   | 1.19 | 3.07 | 0.00 | 0.00 | 4.27  | -0.27     |
| N       | 1   | 1.62 | 3.36 | 0.00 | 0.00 | 4.98  | 0.02      |
| O       | 1   | 1.85 | 4.46 | 0.00 | 0.00 | 6.31  | -0.31     |

Atomic Populations (Mulliken) of AOB

| Species | Ion | s    | p    | d    | f    | Total | Charge(e) |
|---------|-----|------|------|------|------|-------|-----------|
| H       | 1   | 0.68 | 0.00 | 0.00 | 0.00 | 0.68  | 0.32      |
| H       | 2   | 0.69 | 0.00 | 0.00 | 0.00 | 0.69  | 0.31      |
| H       | 3   | 0.70 | 0.00 | 0.00 | 0.00 | 0.70  | 0.30      |
| H       | 4   | 0.71 | 0.00 | 0.00 | 0.00 | 0.71  | 0.29      |
| H       | 5   | 0.71 | 0.00 | 0.00 | 0.00 | 0.71  | 0.29      |
| H       | 6   | 0.70 | 0.00 | 0.00 | 0.00 | 0.70  | 0.30      |
| H       | 7   | 0.67 | 0.00 | 0.00 | 0.00 | 0.67  | 0.33      |
| H       | 8   | 0.71 | 0.00 | 0.00 | 0.00 | 0.71  | 0.29      |
| H       | 9   | 0.71 | 0.00 | 0.00 | 0.00 | 0.71  | 0.29      |
| H       | 10  | 0.71 | 0.00 | 0.00 | 0.00 | 0.71  | 0.29      |
| C       | 1   | 1.26 | 3.01 | 0.00 | 0.00 | 4.27  | -0.27     |
| C       | 2   | 1.26 | 3.01 | 0.00 | 0.00 | 4.27  | -0.27     |
| C       | 3   | 1.26 | 3.03 | 0.00 | 0.00 | 4.28  | -0.28     |
| C       | 4   | 1.25 | 3.00 | 0.00 | 0.00 | 4.26  | -0.26     |
| C       | 5   | 1.12 | 2.74 | 0.00 | 0.00 | 3.87  | 0.13      |
| C       | 6   | 1.25 | 2.99 | 0.00 | 0.00 | 4.24  | -0.24     |
| C       | 7   | 1.26 | 3.02 | 0.00 | 0.00 | 4.27  | -0.27     |
| C       | 8   | 1.26 | 3.02 | 0.00 | 0.00 | 4.28  | -0.28     |
| C       | 9   | 1.26 | 3.03 | 0.00 | 0.00 | 4.28  | -0.28     |
| C       | 10  | 1.27 | 2.98 | 0.00 | 0.00 | 4.25  | -0.25     |
| C       | 11  | 1.13 | 2.75 | 0.00 | 0.00 | 3.88  | 0.12      |
| C       | 12  | 1.25 | 3.02 | 0.00 | 0.00 | 4.27  | -0.27     |
| N       | 1   | 1.43 | 3.42 | 0.00 | 0.00 | 4.85  | 0.15      |
| N       | 2   | 1.58 | 3.67 | 0.00 | 0.00 | 5.26  | -0.26     |
| O       | 1   | 1.92 | 4.55 | 0.00 | 0.00 | 6.48  | -0.48     |

Atomic Populations (Mulliken) of AB

| Species | Ion | s    | p    | d    | f    | Total | Charge(e) |
|---------|-----|------|------|------|------|-------|-----------|
| H       | 1   | 0.70 | 0.00 | 0.00 | 0.00 | 0.70  | 0.30      |
| H       | 2   | 0.69 | 0.00 | 0.00 | 0.00 | 0.69  | 0.31      |
| H       | 3   | 0.71 | 0.00 | 0.00 | 0.00 | 0.71  | 0.29      |
| H       | 4   | 0.71 | 0.00 | 0.00 | 0.00 | 0.71  | 0.29      |
| H       | 5   | 0.71 | 0.00 | 0.00 | 0.00 | 0.71  | 0.29      |
| H       | 6   | 0.70 | 0.00 | 0.00 | 0.00 | 0.70  | 0.30      |
| H       | 7   | 0.69 | 0.00 | 0.00 | 0.00 | 0.69  | 0.31      |
| H       | 8   | 0.71 | 0.00 | 0.00 | 0.00 | 0.71  | 0.29      |
| H       | 9   | 0.71 | 0.00 | 0.00 | 0.00 | 0.71  | 0.29      |
| H       | 10  | 0.71 | 0.00 | 0.00 | 0.00 | 0.71  | 0.29      |
| C       | 1   | 1.26 | 3.02 | 0.00 | 0.00 | 4.27  | -0.27     |
| C       | 2   | 1.26 | 3.02 | 0.00 | 0.00 | 4.28  | -0.28     |
| C       | 3   | 1.26 | 3.03 | 0.00 | 0.00 | 4.28  | -0.28     |
| C       | 4   | 1.25 | 3.00 | 0.00 | 0.00 | 4.26  | -0.26     |
| C       | 5   | 1.13 | 2.74 | 0.00 | 0.00 | 3.87  | 0.13      |
| C       | 6   | 1.26 | 3.01 | 0.00 | 0.00 | 4.26  | -0.26     |
| C       | 7   | 1.26 | 3.02 | 0.00 | 0.00 | 4.27  | -0.27     |
| C       | 8   | 1.26 | 3.02 | 0.00 | 0.00 | 4.28  | -0.28     |
| C       | 9   | 1.26 | 3.03 | 0.00 | 0.00 | 4.28  | -0.28     |
| C       | 10  | 1.26 | 3.00 | 0.00 | 0.00 | 4.26  | -0.26     |
| C       | 11  | 1.13 | 2.74 | 0.00 | 0.00 | 3.87  | 0.13      |
| C       | 12  | 1.26 | 3.01 | 0.00 | 0.00 | 4.26  | -0.26     |
| N       | 1   | 1.60 | 3.65 | 0.00 | 0.00 | 5.25  | -0.25     |
| N       | 2   | 1.59 | 3.66 | 0.00 | 0.00 | 5.25  | -0.25     |

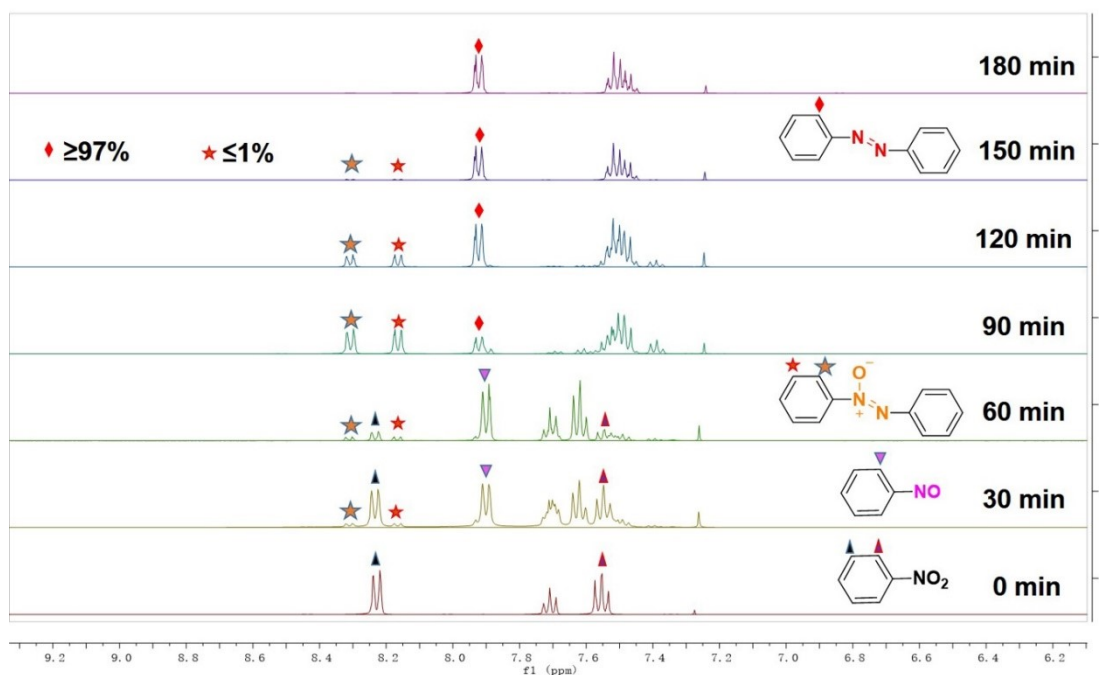

Figure S19.  $^1\text{H}$  NMR analysis of the crude products during different reaction time recorded in  $\text{CDCl}_3$  for mechanistic study.

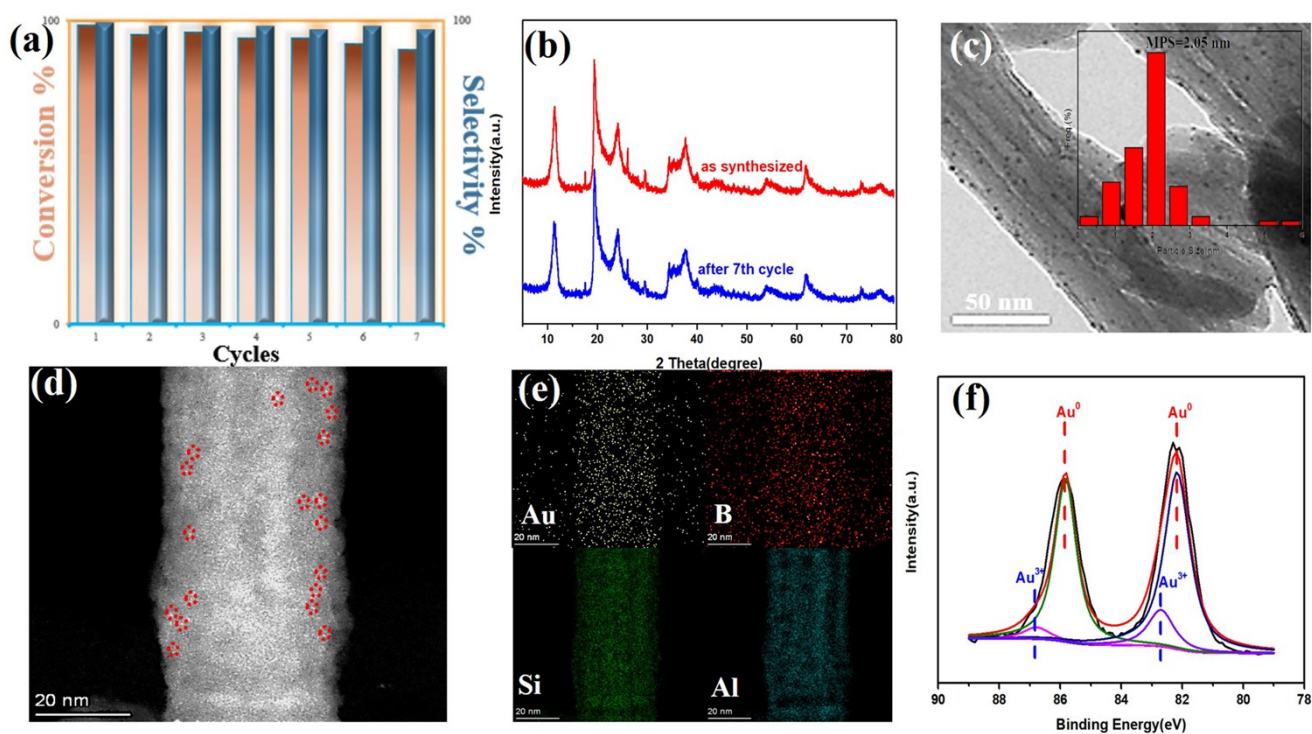

Figure S20. (a) Reusability of  $\text{HNT@B}_{12}\text{H}_{12}@Au$  (conversions and selectivity are based on GC), (b) PXRD of recycled  $\text{HNT@B}_{12}\text{H}_{12}@Au$  after seven cycles, (c) HRTEM of recycled  $\text{HNT@B}_{12}\text{H}_{12}@Au$  after seven cycles, (d) HAADF-STEM image of  $\text{HNT@B}_{12}\text{H}_{12}@Au$  after 7th use, and representative B, Au, Al, Si elemental mapping of (e), (f) XPS spectra of Au on the recycled  $\text{HNT@B}_{12}\text{H}_{12}@Au$ .

## Spectroscopic characterizations of the azo products

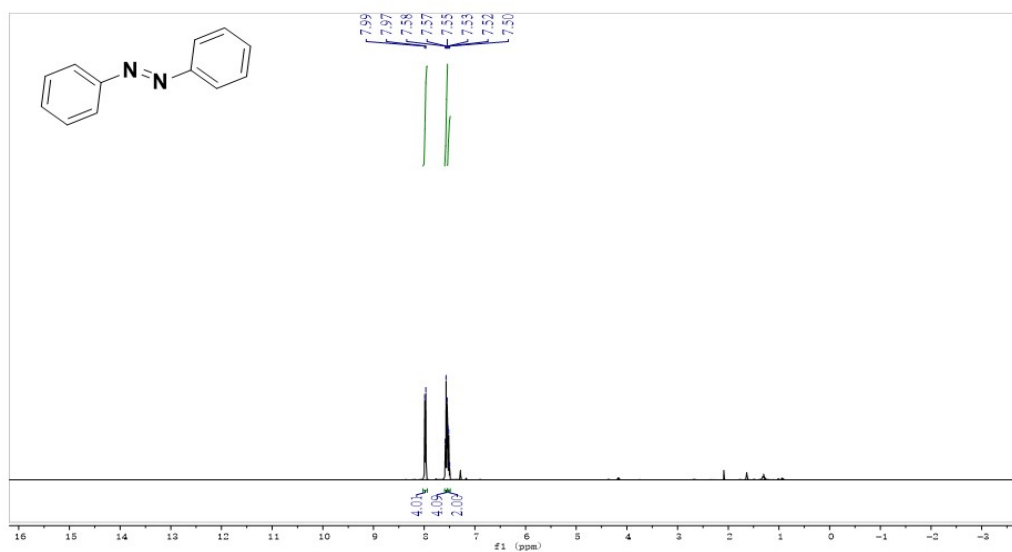

<sup>1</sup>H NMR spectrum of (*E*)-1, 2-bisphenyldiazene recorded in CDCl<sub>3</sub>, δ 7.99-7.97 (m, 4H), 7.58-7.50 (m, 6H).

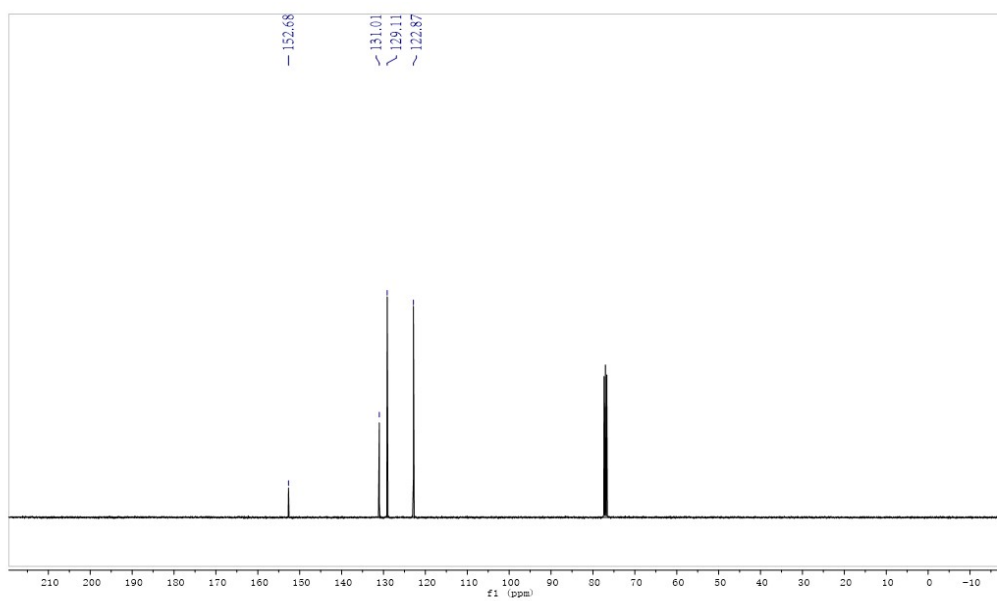

<sup>13</sup>C NMR spectrum of (*E*)-1, 2-bisphenyldiazene recorded in CDCl<sub>3</sub>, δ 152.68, 131.01, 129.11, 122.87.

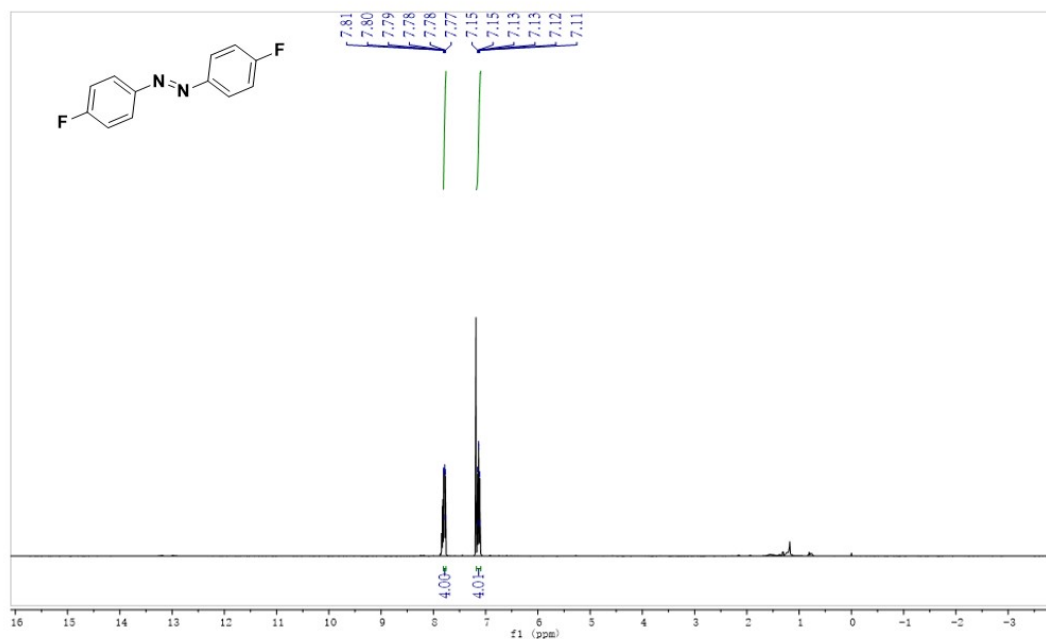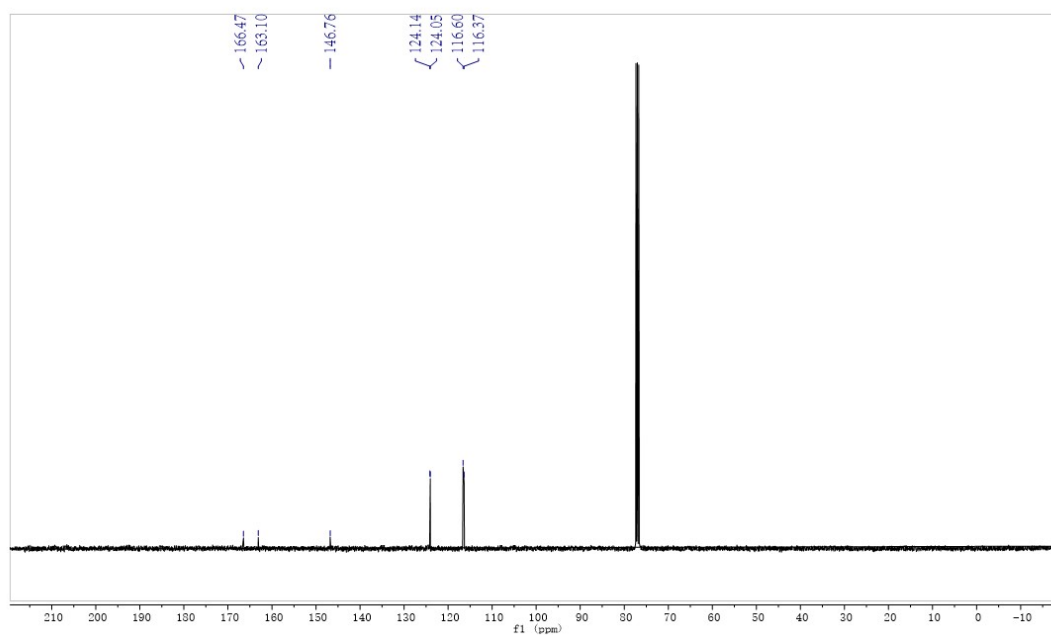

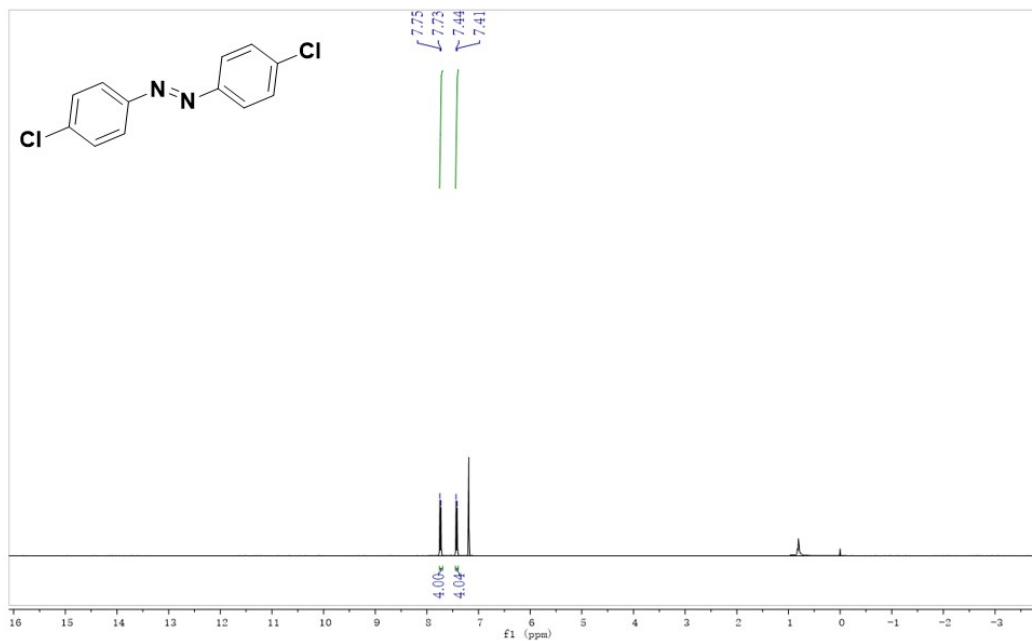

<sup>1</sup>H NMR spectrum of (*E*)- 1, 2-bis(4-chlorophenyl)diazene recorded in CDCl<sub>3</sub>, δ 7.75-7.73 (d, *J*=8 Hz, 4H), 7.44-7.41 (d, *J*=12 Hz,4H).

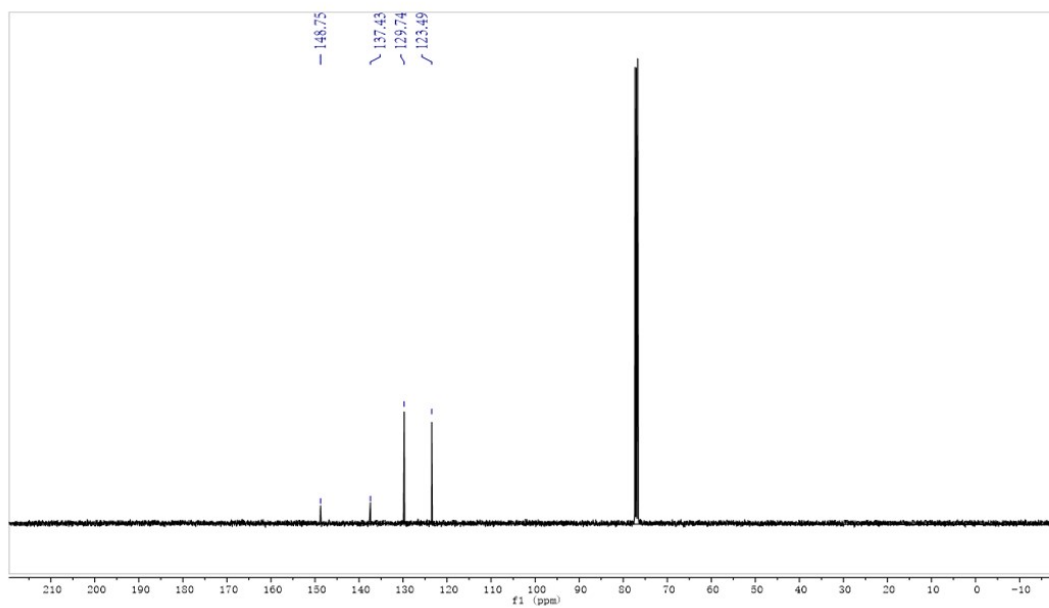

<sup>13</sup>C NMR spectrum of (*E*)- 1, 2-bis(4-chlorophenyl)diazene recorded in CDCl<sub>3</sub>, δ 148.85, 137.43, 129.74, 123.49.



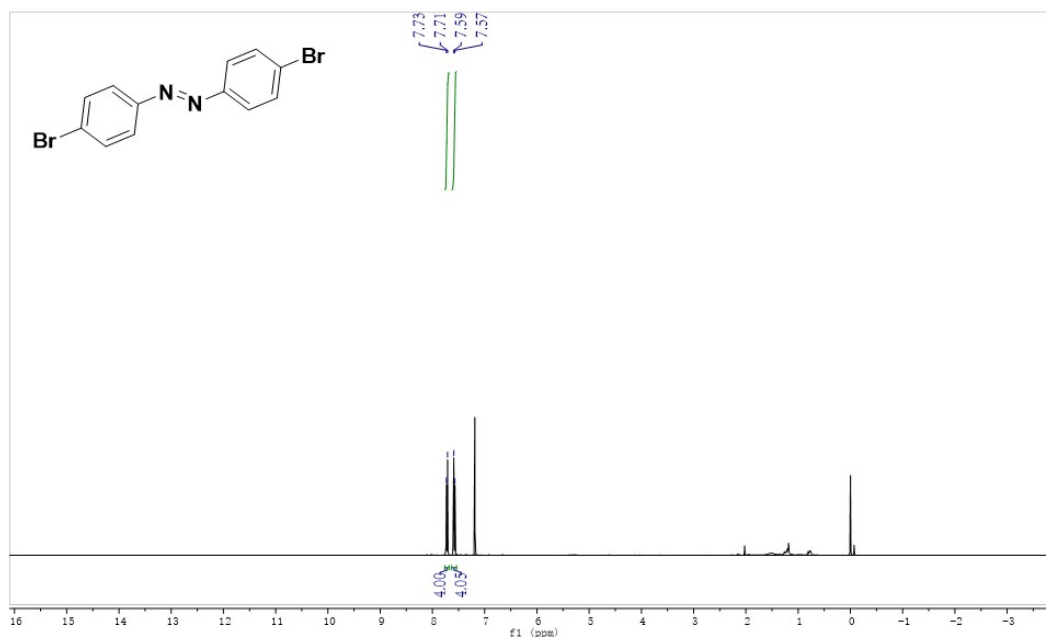

<sup>1</sup>H NMR spectrum of *(E)*-1,2-bis(4-bromophenyl)diazene recorded in CDCl<sub>3</sub>, δ 7.73-7.71 (d, *J*=8 Hz, 4H), 7.59-7.57 (d, *J*=8 Hz, 4H).

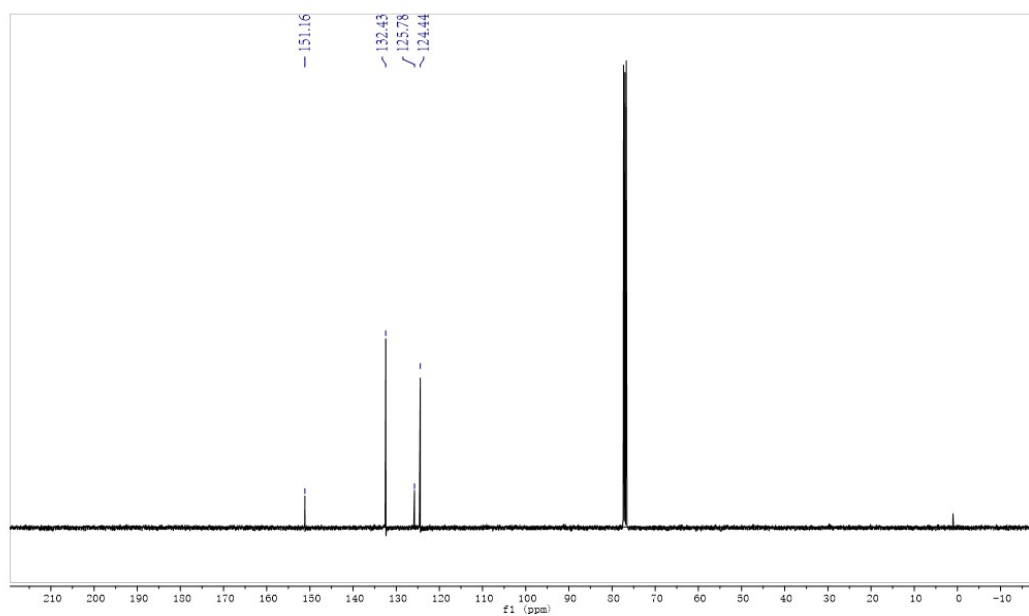

<sup>13</sup>C NMR spectrum of *(E)*-1,2-bis(4-bromophenyl)diazene recorded in CDCl<sub>3</sub>, δ 151.16, 132.43, 125.78, 124.44.

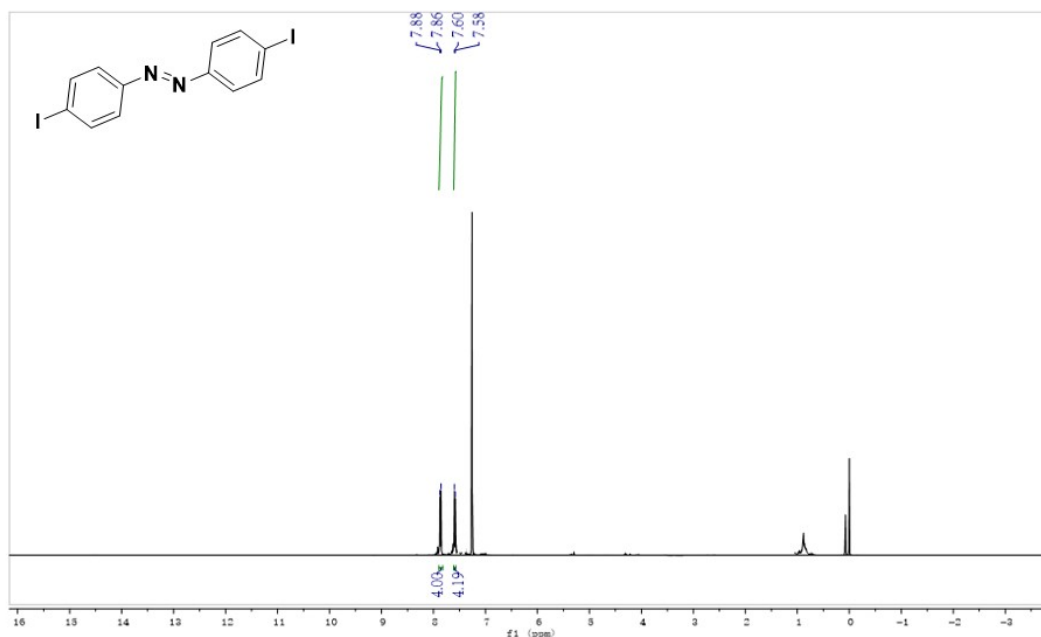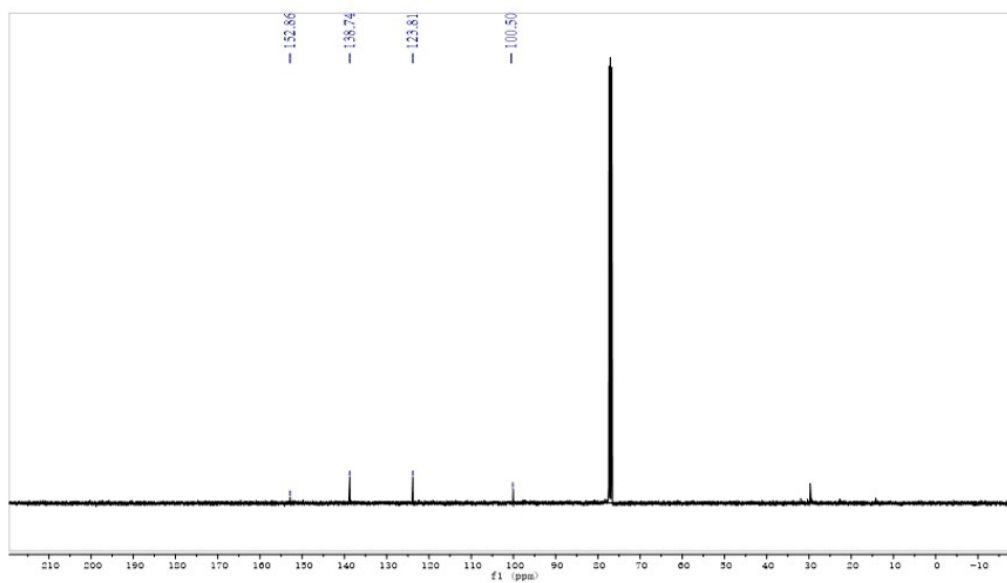

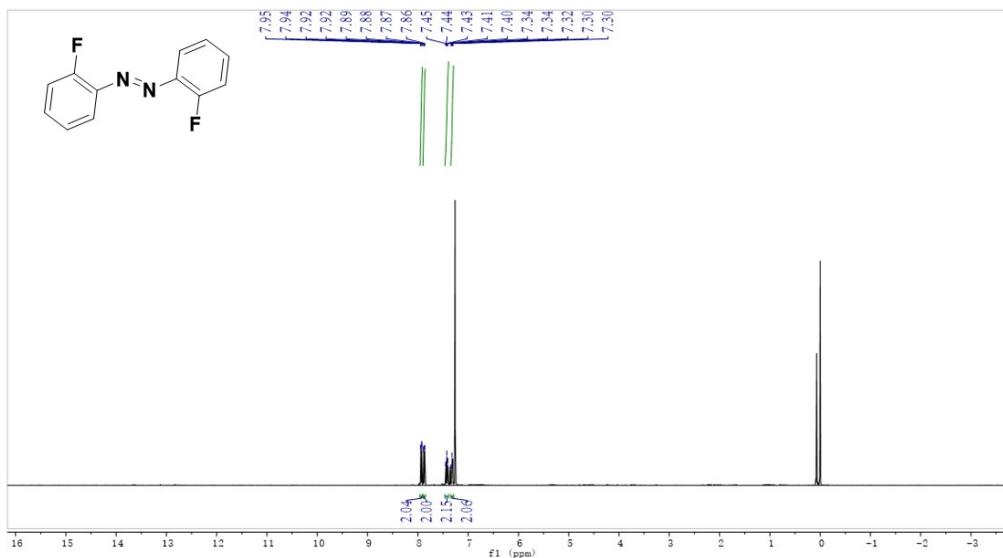

<sup>1</sup>H NMR spectrum of (*E*) - 1,2-bis(2-fluorophenyl) diazene recorded in CDCl<sub>3</sub>, δ 7.95-7.92 (m, 2H), 7.89-7.86 (m, 2H), 7.45-7.40(m, 2H), 7.34-7.30(m, 2H).

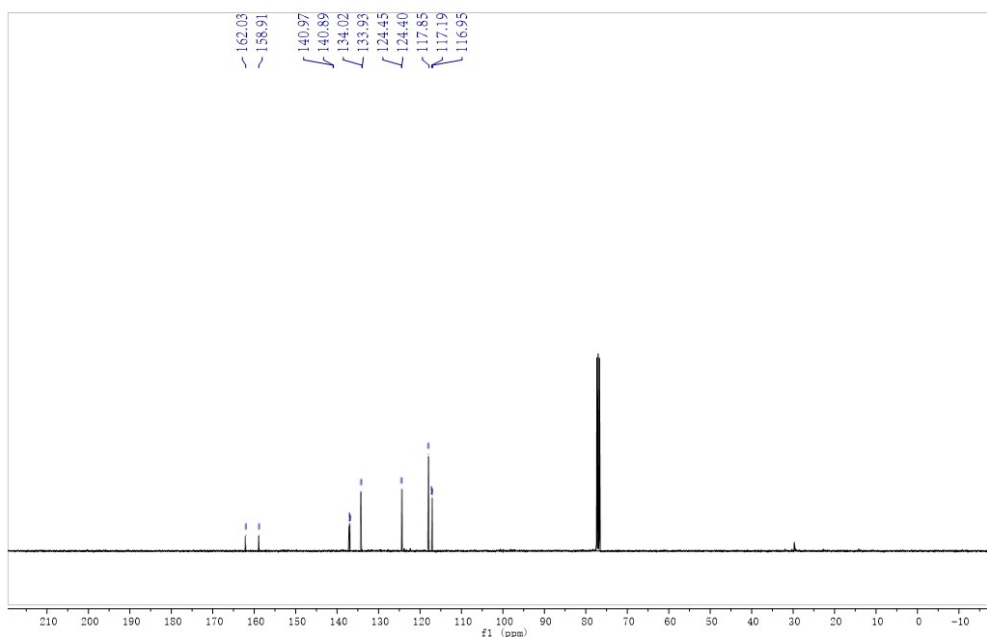

<sup>13</sup>C NMR spectrum of (*E*) - 1,2-bis(2-fluorophenyl) diazene recorded in CDCl<sub>3</sub>, δ 162.03-158.91(d, *J* = 312 Hz), 140.97-140.89 (d, *J* = 8 Hz), 134.02-133.93 (d, *J* = 9 Hz), 124.45-124.40 (d, *J* = 5Hz), 117.85, 117.19-116.95 (d, *J* = 24 Hz).

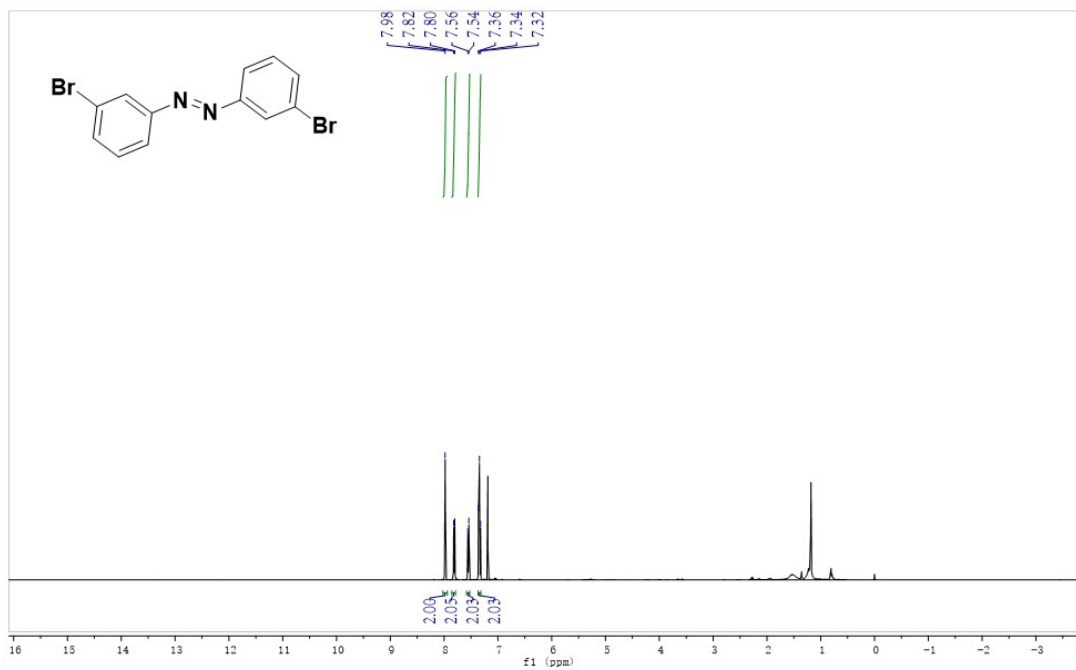

<sup>1</sup>H NMR spectrum of (*E*)-1,2-bis(3-bromophenyl)diazene recorded in CDCl<sub>3</sub>, δ 7.98 (s, 2H), 7.82-7.80 (d, *J*=8 Hz, 2H), 7.56-7.54 (d, *J*=8 Hz, 2H), 7.36-7.32 (t, *J*=16 Hz, 2H).

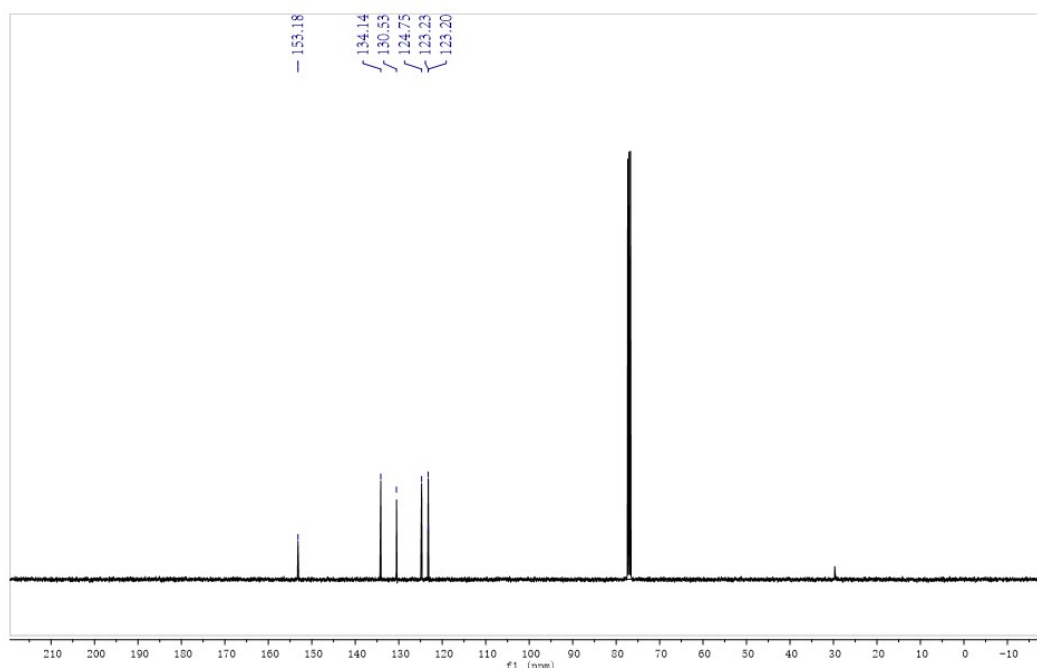

<sup>13</sup>C NMR spectrum of (*E*)-1,2-bis(3-bromophenyl)diazene recorded in CDCl<sub>3</sub>, δ 153.18, 134.14, 130.53, 124.75, 123.23, 123.20.

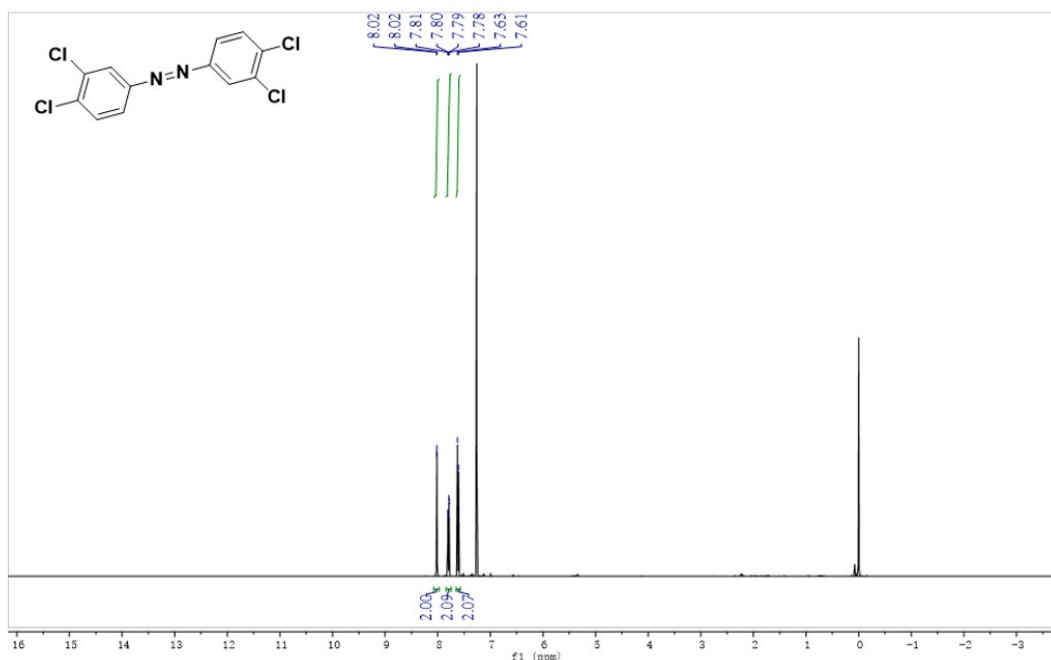

<sup>1</sup>H NMR spectrum of (*E*)-1,2-bis(3,4-dichlorophenyl)diazene recorded in CDCl<sub>3</sub>, δ 8.02 (s, 2H), 7.81-7.78 (d, *J*=12 Hz, 2H), 7.63-7.61 (d, *J*=8 Hz, 2H).

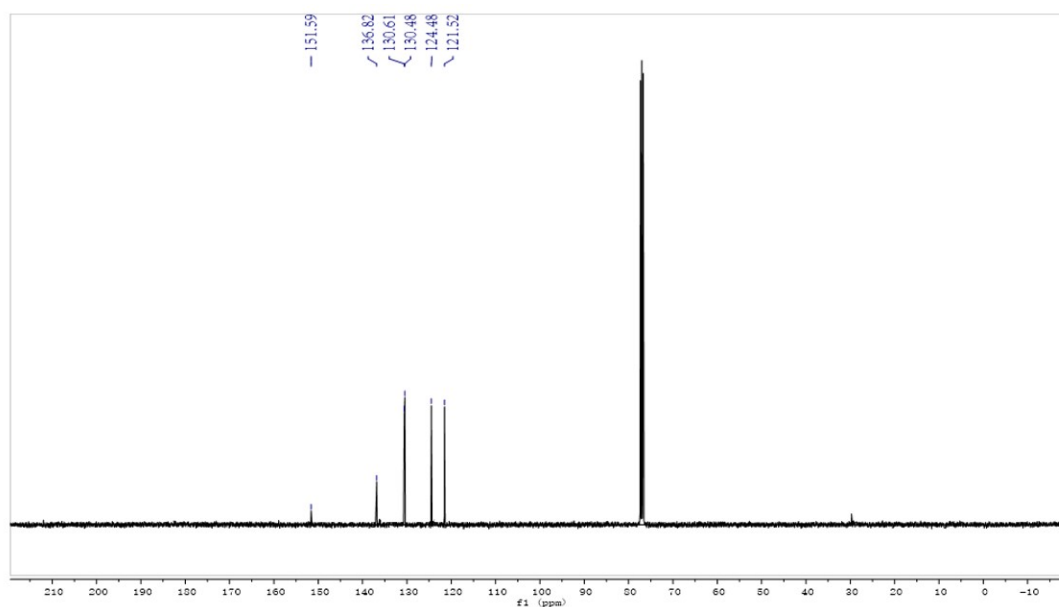

<sup>13</sup>C NMR spectrum of (*E*)-1,2-bis(3,4-dichlorophenyl)diazene recorded in CDCl<sub>3</sub>, δ 151.59, 136.82, 130.61, 130.48, 124.48, 121.52.

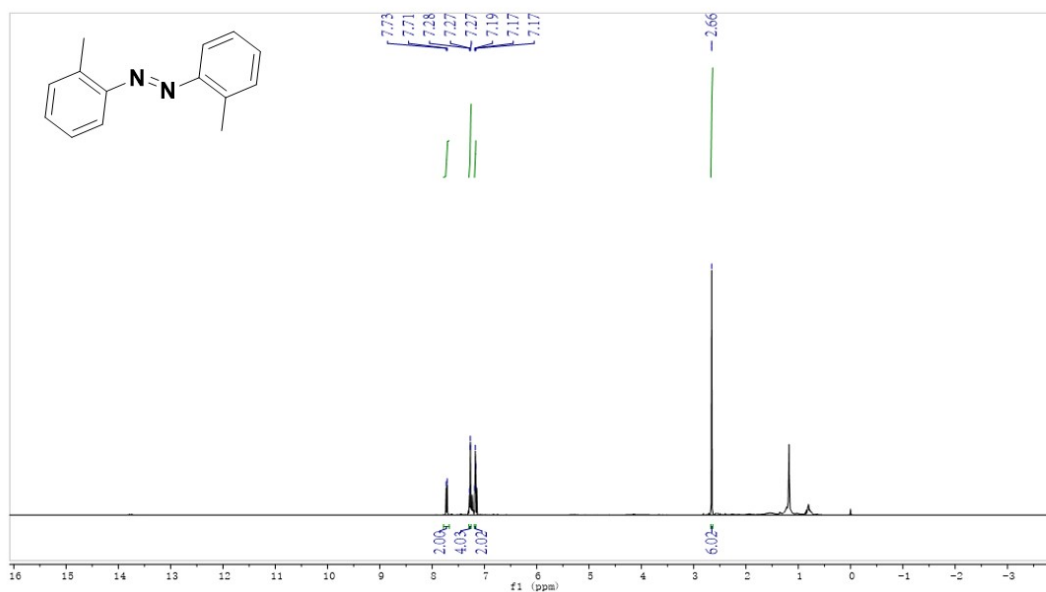

<sup>1</sup>H NMR spectrum of (E)-1,2-di-o-tolyldiazene recorded in CDCl<sub>3</sub>, δ 7.73-7.71 (m, 2H), 7.28-7.27 (m, 4H), 7.19-7.17(m, 2H), 2.66(s, 6H).

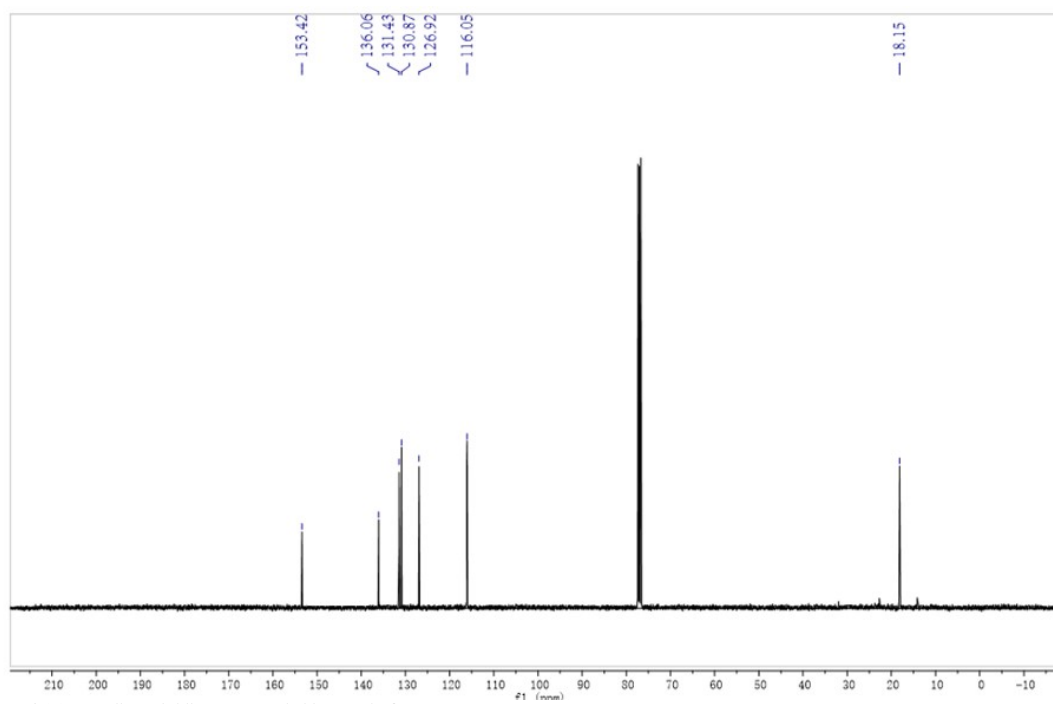

<sup>13</sup>C NMR spectrum of (E)-1,2-di-o-tolyldiazene recorded in CDCl<sub>3</sub>, δ 153.42, 136.05, 131.43, 130.87, 126.92, 116.05, 18.15.

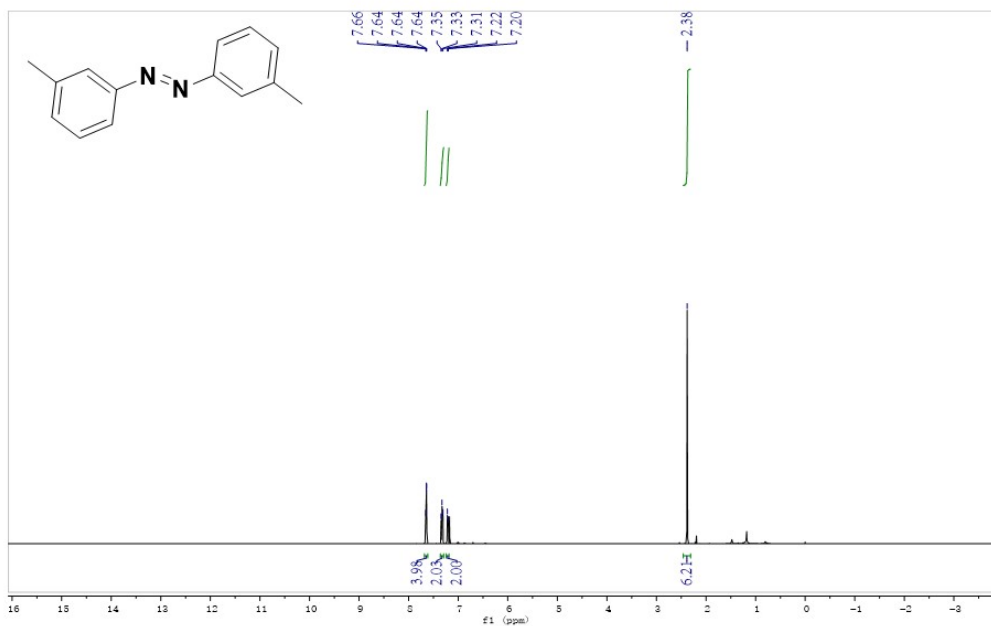

<sup>1</sup>H NMR spectrum of (E)-1,2-di-m-tolyldiazene recorded in CDCl<sub>3</sub>, δ 7.66-7.64 (m, 4H), 7.35-7.31 (t, *J*=16 Hz, 2H), 7.22-7.20 (d, *J*=8 Hz, 2H), 2.38 (s, 6H).

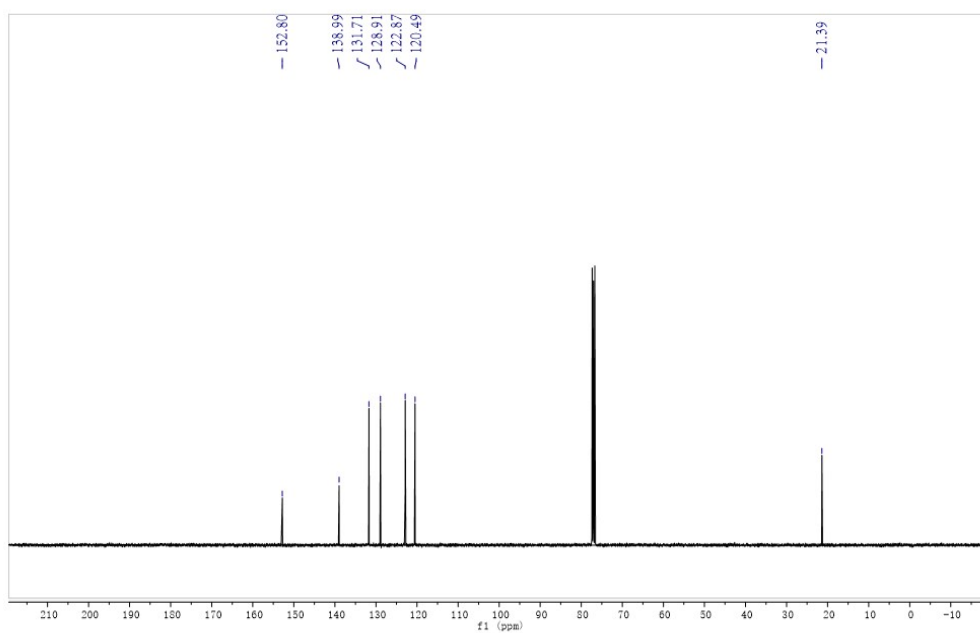

<sup>13</sup>C NMR spectrum of (E)-1,2-di-m-tolyldiazene recorded in CDCl<sub>3</sub>, δ 152.80, 138.99, 131.71, 128.91, 122.87, 120.49, 21.39.

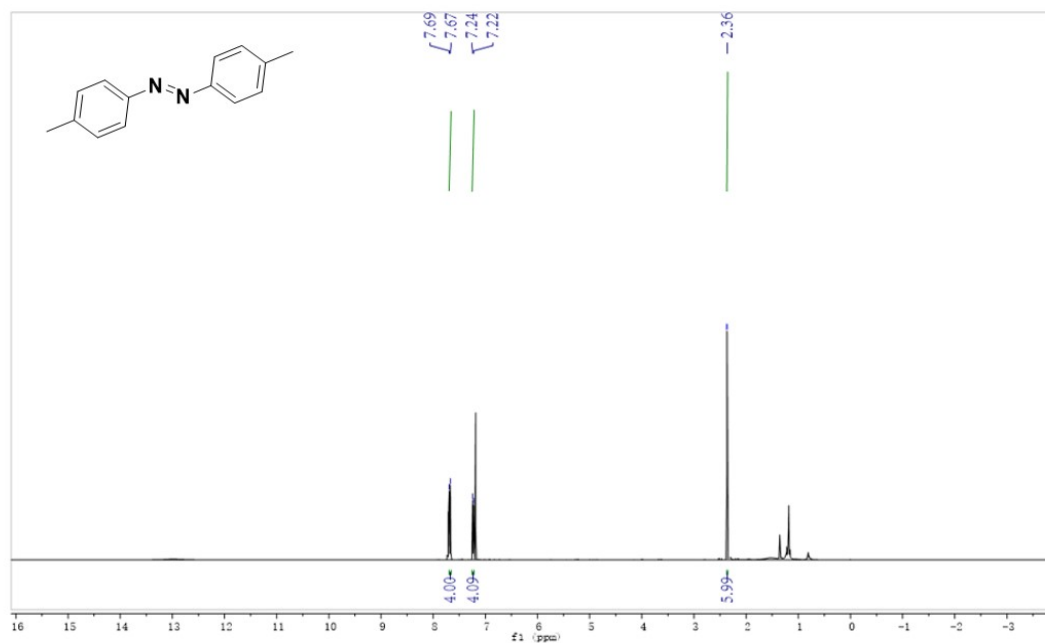

<sup>1</sup>H NMR spectrum of (*E*)-1,2-di-p-tolyldiazene recorded in CDCl<sub>3</sub>, δ 7.69-7.67 (d, *J*=8 Hz, 4H), 7.24-7.22 (d, *J*=8 Hz, 4H), 2.36 (s, 6H).

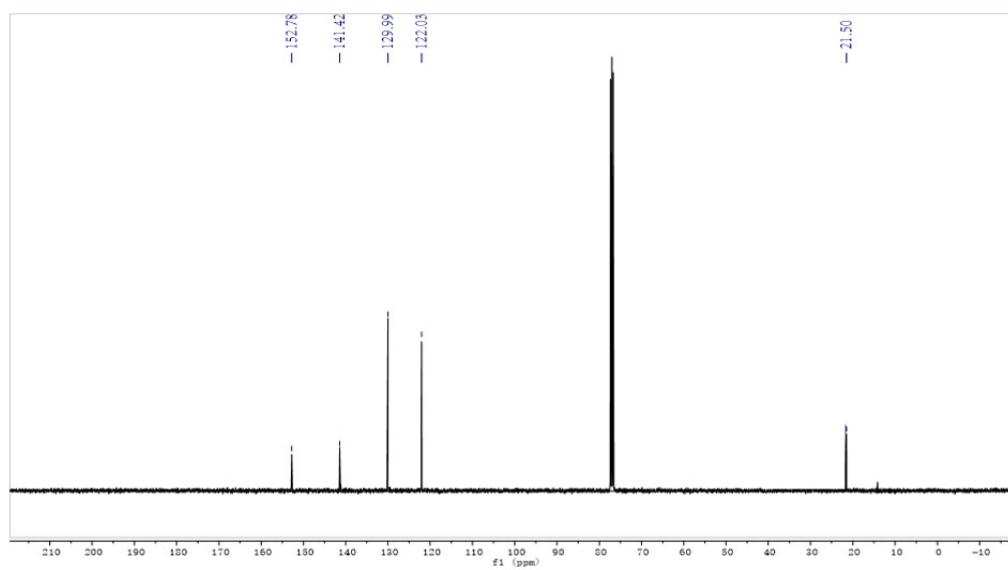

<sup>13</sup>C NMR spectrum of (*E*)-1,2-di-p-tolyldiazene recorded in CDCl<sub>3</sub>, δ 152.78, 141.42, 129.99, 122.03, 21.50.



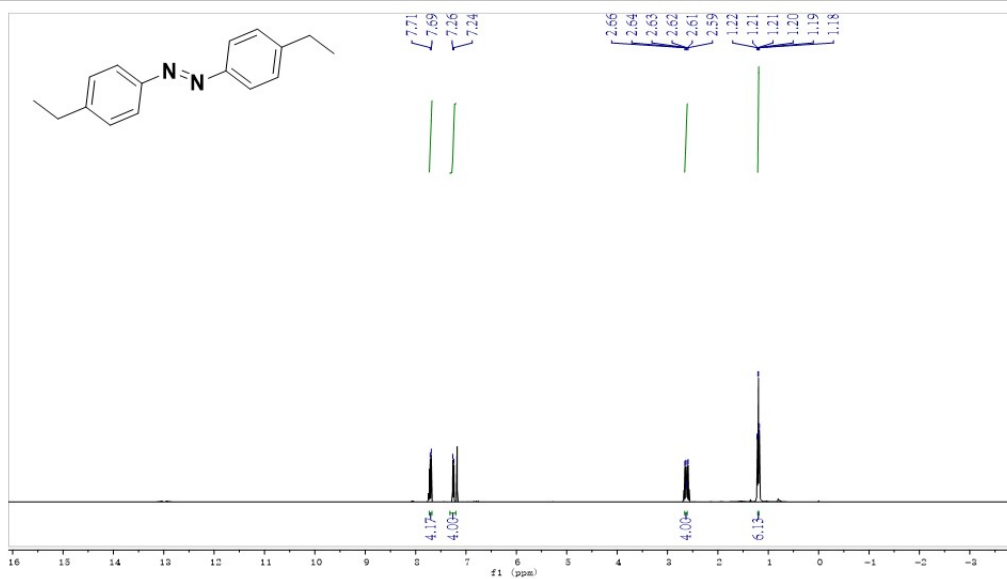

$^1\text{H}$  NMR spectrum of (*E*)-1,2-di-p-ethylphenyldiazene recorded in  $\text{CDCl}_3$ ,  $\delta$  7.71-7.69 (d,  $J=8$  Hz, 4H), 7.26-7.24 (d,  $J=8$  Hz, 4H), 2.66-2.59 (m, 4H), 1.22-1.18 (t,  $J=16$  Hz, 6H).

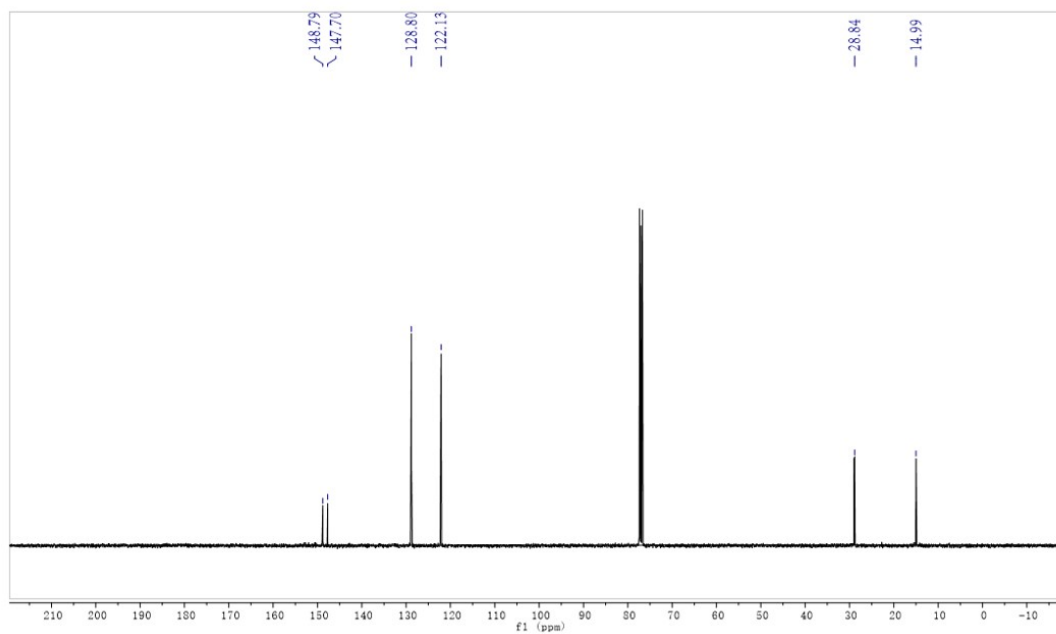

$^{13}\text{C}$  NMR spectrum of (*E*)-1,2-di-p-ethylphenyldiazene recorded in  $\text{CDCl}_3$ ,  $\delta$  148.79, 147.70, 128.80, 122.13, 28.84, 14.99.

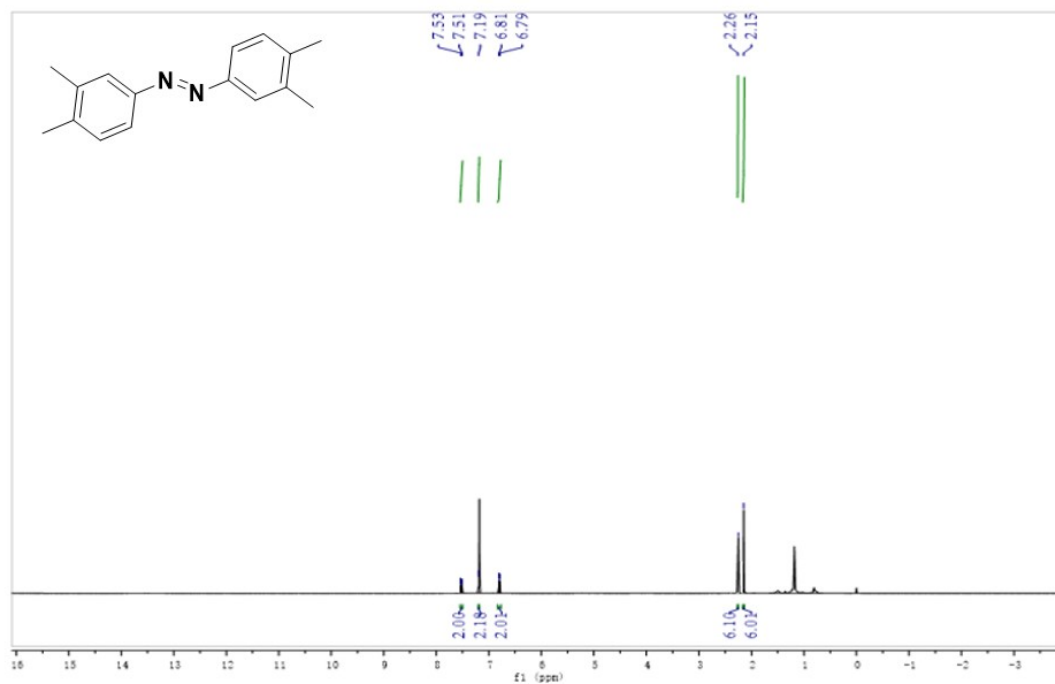

<sup>1</sup>H NMR spectrum of (*E*)-1,2-bis(3,4-dimethylphenyl)diazene recorded in CDCl<sub>3</sub>, δ 7.53-7.41 (d, *J*=8 Hz, 2H), 7.19(s, 2H), 6.81-6.79(d, *J*=8 Hz, 2H), 2.26(s, 6H), 2.15(s, 6H).

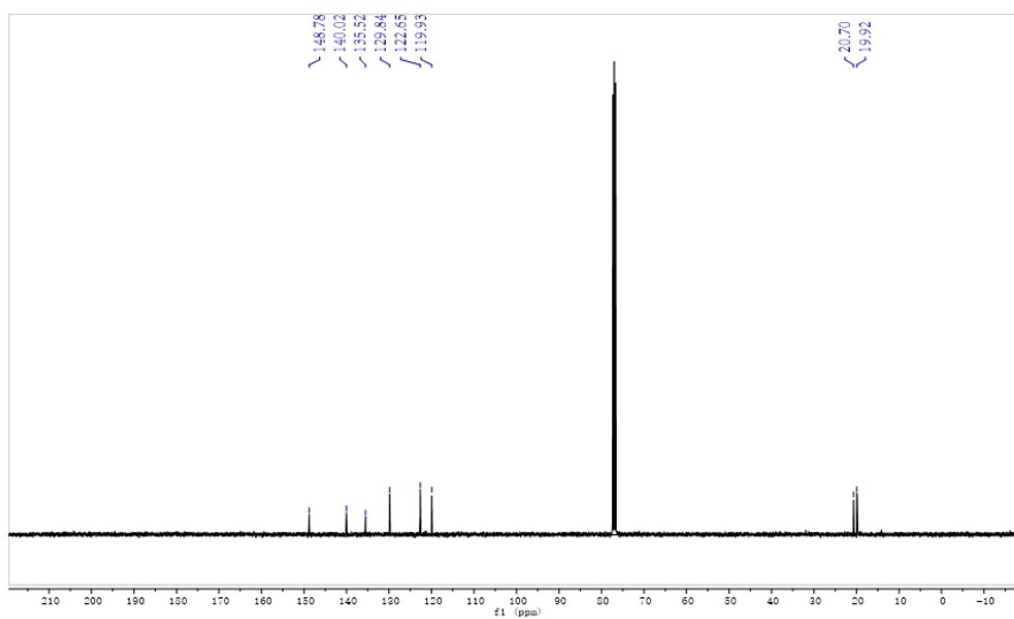

<sup>13</sup>C NMR spectrum of (*E*)-1,2-bis(3,4-dimethylphenyl)diazene recorded in CDCl<sub>3</sub>, δ 148.78, 140.02, 135.52, 129.84, 122.65, 119.93, 20.70, 19.92.

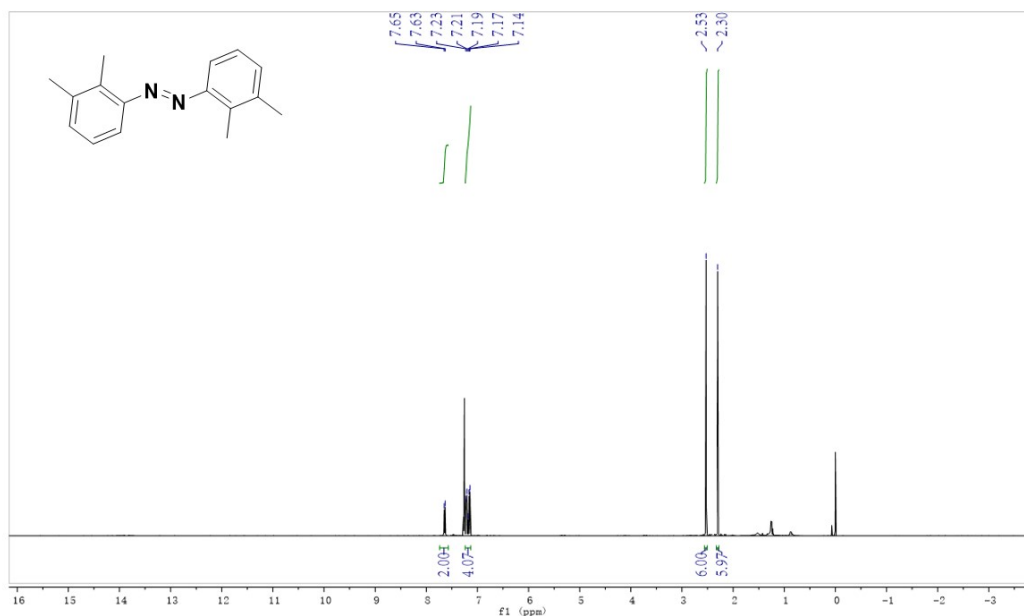

<sup>1</sup>H NMR spectrum of (*E*) - 1, 2-bis(2, 3-dimethylphenyl)diazene recorded in CDCl<sub>3</sub>, δ 7.65-7.63 (d, *J*=8 Hz, 2H), 7.23-7.14(m, 4H), 2.53(s, 6H), 2.30(s, 6H).

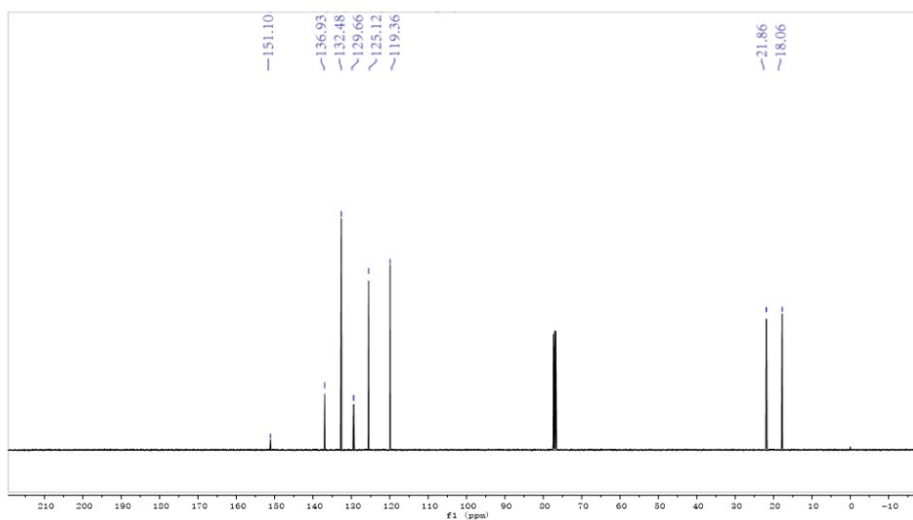

<sup>13</sup>C NMR spectrum of (*E*) - 1, 2-bis(2, 3-dimethylphenyl)diazene recorded in CDCl<sub>3</sub>, δ 151.10, 136.93, 132.48, 129.99, 125.12, 119.36, 21.86, 18.06.

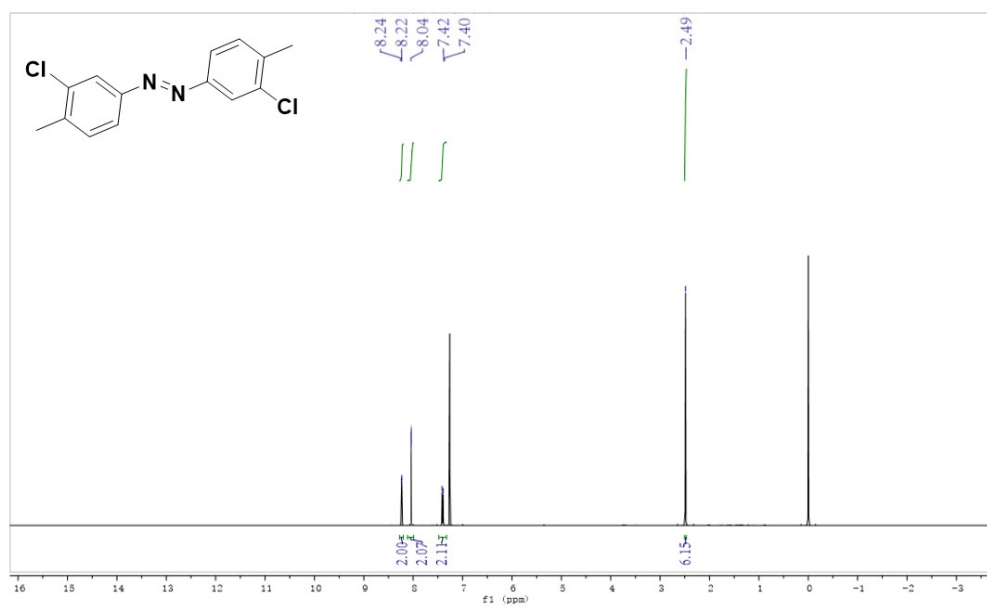

<sup>1</sup>H NMR spectrum of (*E*) - 1, 2-bis(3- chloro, 4-methylphenyl)diazene recorded in CDCl<sub>3</sub>, δ 8.24-8.22 (d, *J*=8 Hz, 2H), 8.04(s, 2H), 7.42-7.40(d, *J*=8 Hz, 2H), 2.49(s, 6H).

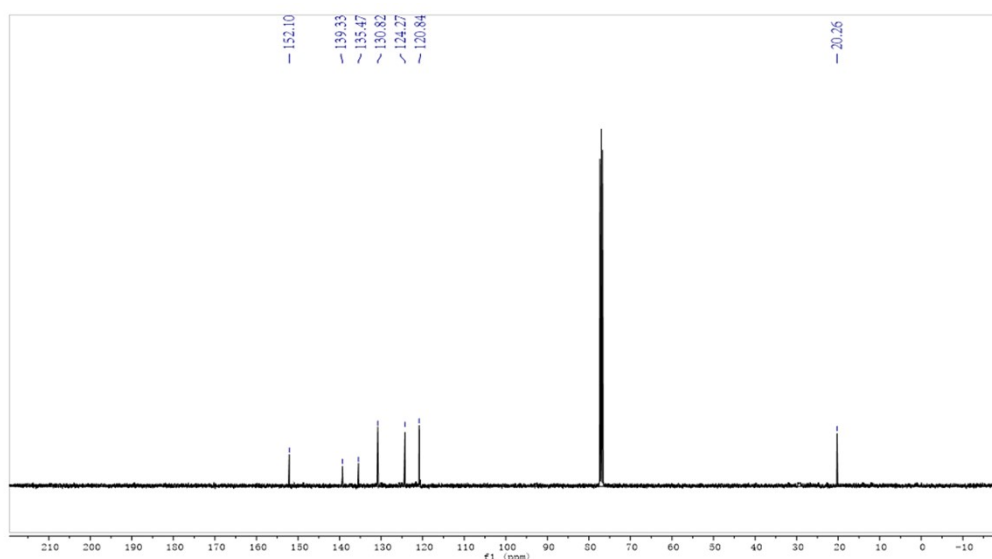

<sup>13</sup>C NMR spectrum of (*E*) - 1, 2-bis(3- chloro, 4-methylphenyl)diazene recorded in CDCl<sub>3</sub>, δ 152.10, 139.33, 135.47, 130.82, 124.27, 120.84, 20.26.

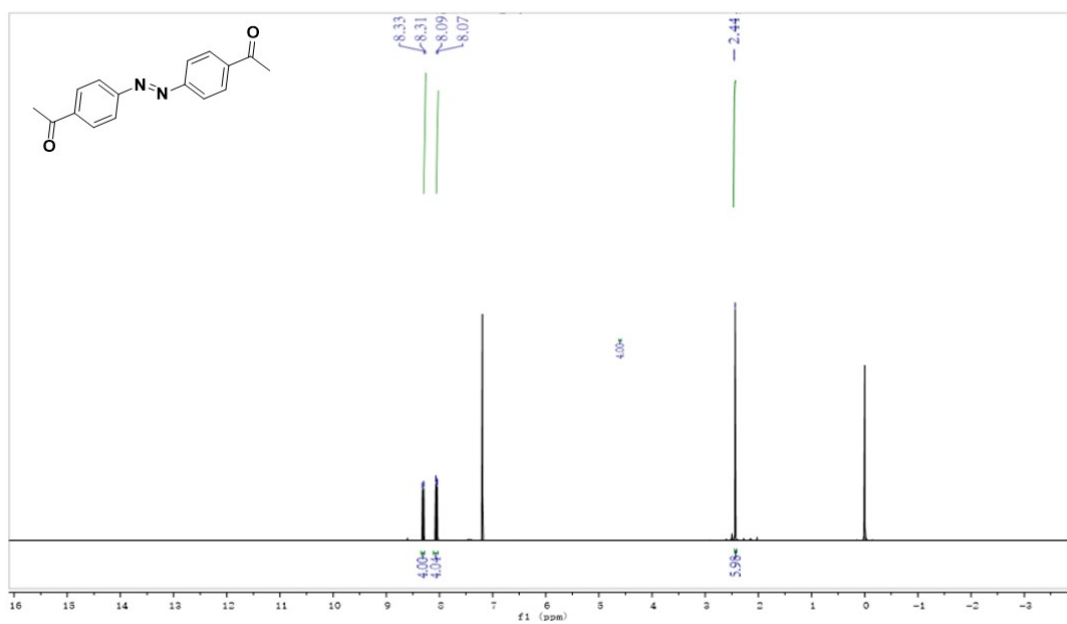

<sup>1</sup>H NMR spectrum of (*E*)-1,2-bis(4-acetophenyl)diazene recorded in CDCl<sub>3</sub>, δ 8.33-8.31 (d, *J*=8 Hz, 2H), 8.09-8.07(d, *J*=8 Hz, 2H), 2.44(s, 6H).

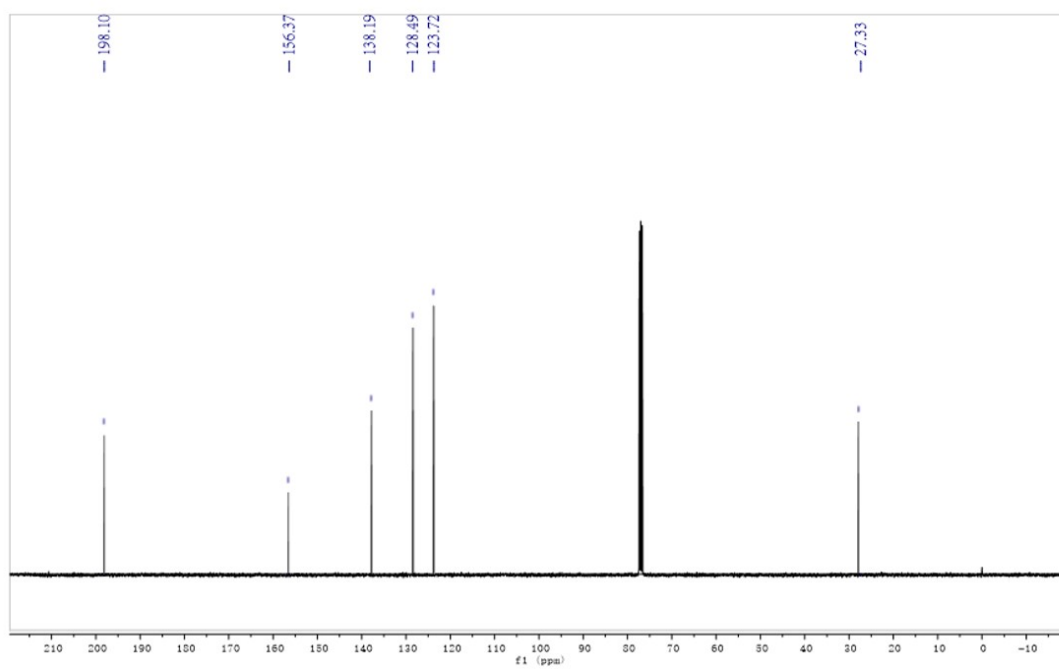

<sup>13</sup>C NMR spectrum of (*E*)-1,2-bis(4-acetophenyl)diazene recorded in CDCl<sub>3</sub>, δ 198.10, 156.37, 138.19, 128.49, 123.72, 27.33.

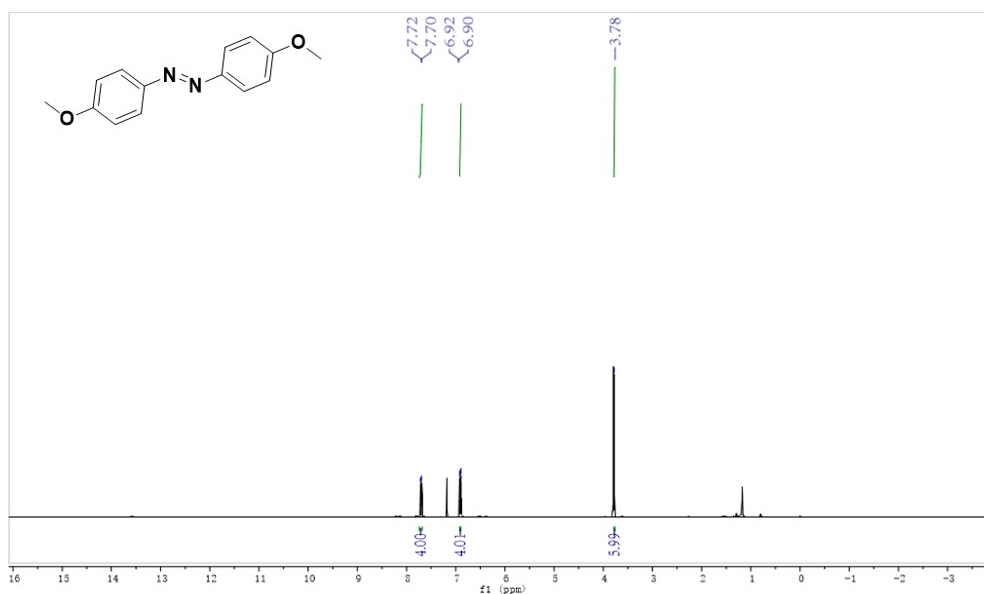

<sup>1</sup>H NMR spectrum of (*E*)-1,2-bis(4-methoxyphenyl)diazene recorded in CDCl<sub>3</sub>, δ 7.72-7.70 (d, *J*=8 Hz, 4H), 6.92-6.90 (d, *J*=8 Hz, 2H), 3.78 (s, 6H).

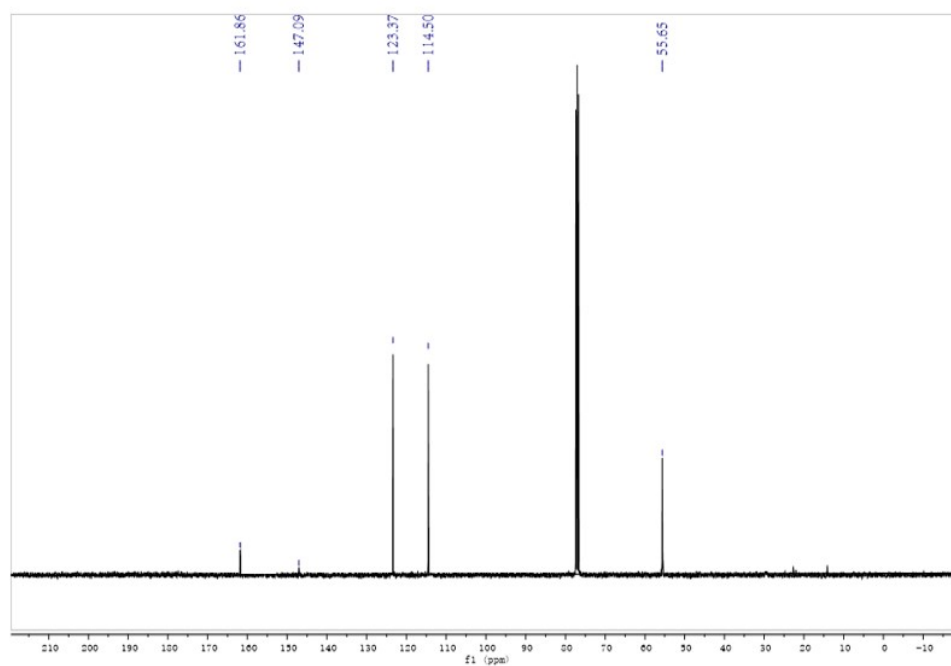

<sup>13</sup>C NMR spectrum of (*E*)-1,2-bis(4-methoxyphenyl)diazene recorded in CDCl<sub>3</sub>, 161.85, 147.09, 123.37, 114.50, 55.65.

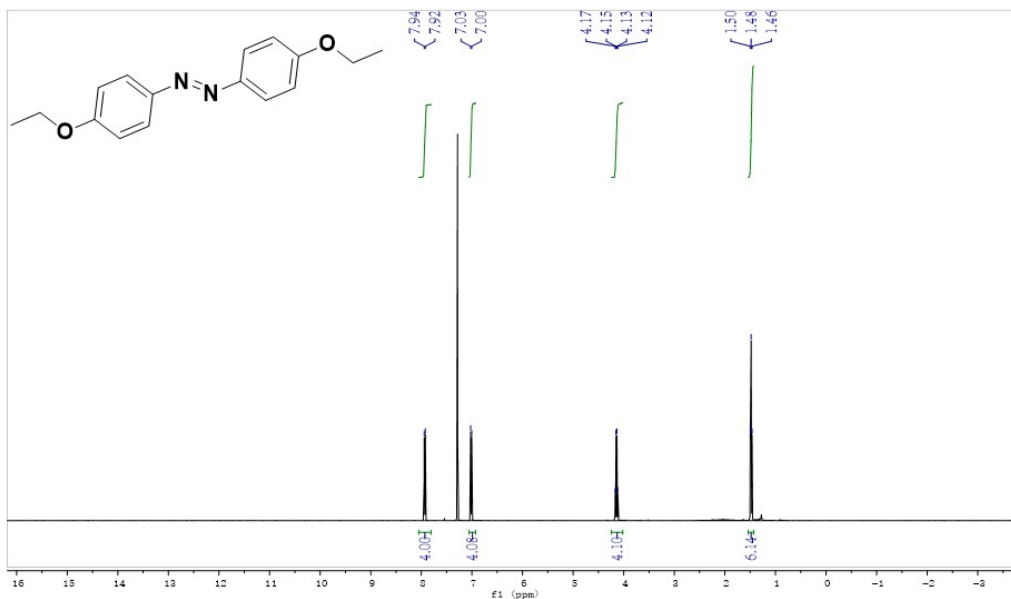

<sup>1</sup>H NMR spectrum of (*E*)-1,2-bis(4-methoxyphenyl)diazene recorded in CDCl<sub>3</sub>, δ 7.94-7.92 (d, *J*=8 Hz, 4H), 7.03-7.00(d, *J*=8 Hz, 4H), 4.17-4.12(m, 4H), 1.50-1.46(t, *J*=16 Hz, 6H).

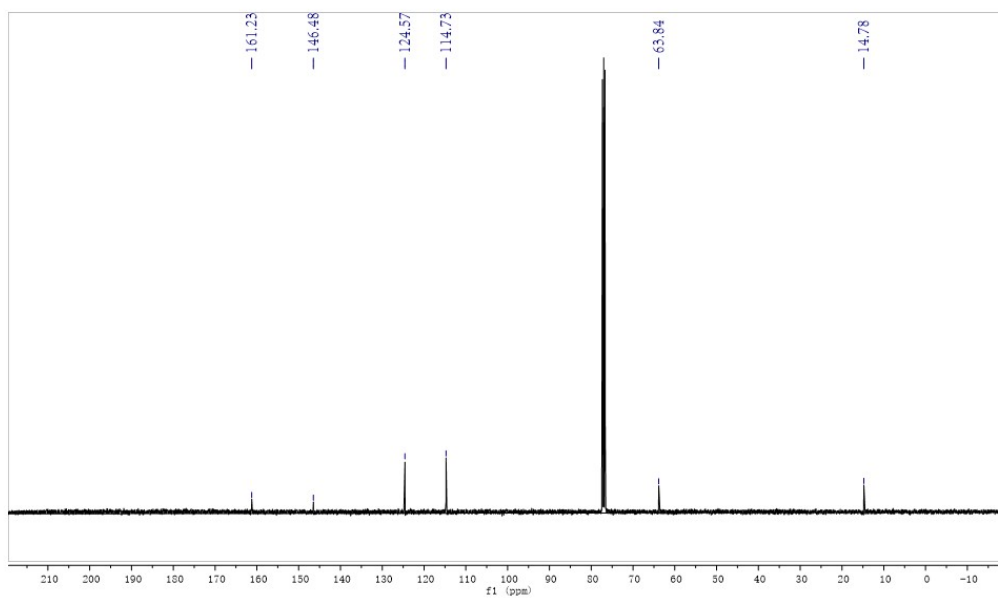

<sup>13</sup>C NMR spectrum of (*E*)-1,2-bis(4-methoxyphenyl)diazene recorded in CDCl<sub>3</sub>, δ 161.23, 146.48, 124.57, 114.73, 63.84, 14.78.

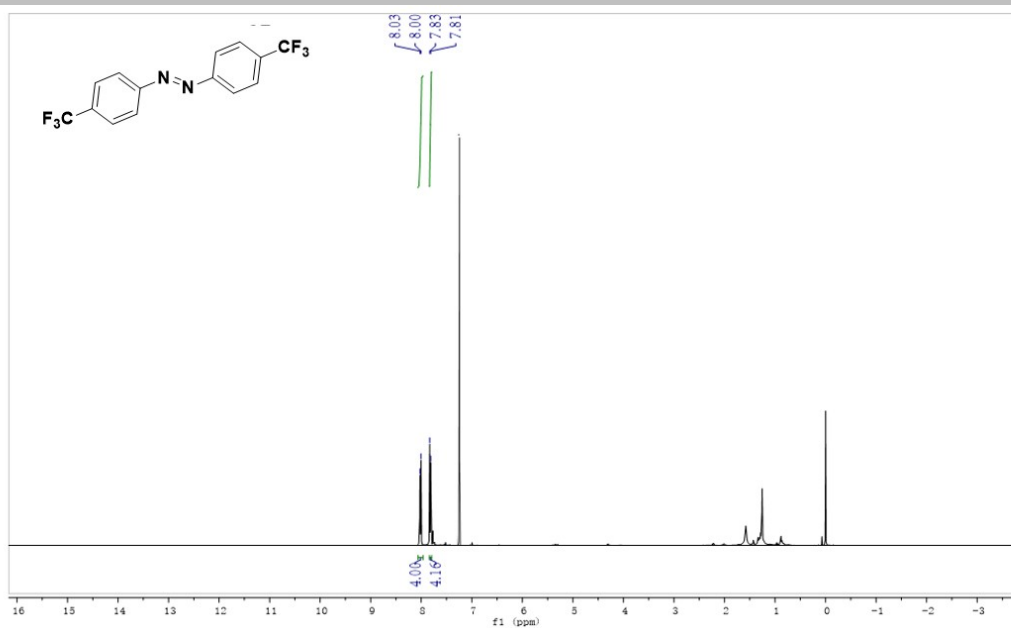

$^1\text{H}$  NMR spectrum of (*E*)-1,2-bis(4-(trifluoromethyl)phenyl)diazene recorded in  $\text{CDCl}_3$ ,  $\delta$  8.03-8.00 (d,  $J=8$  Hz, 4H), 7.83-7.81(d,  $J=8$  Hz, 4H).

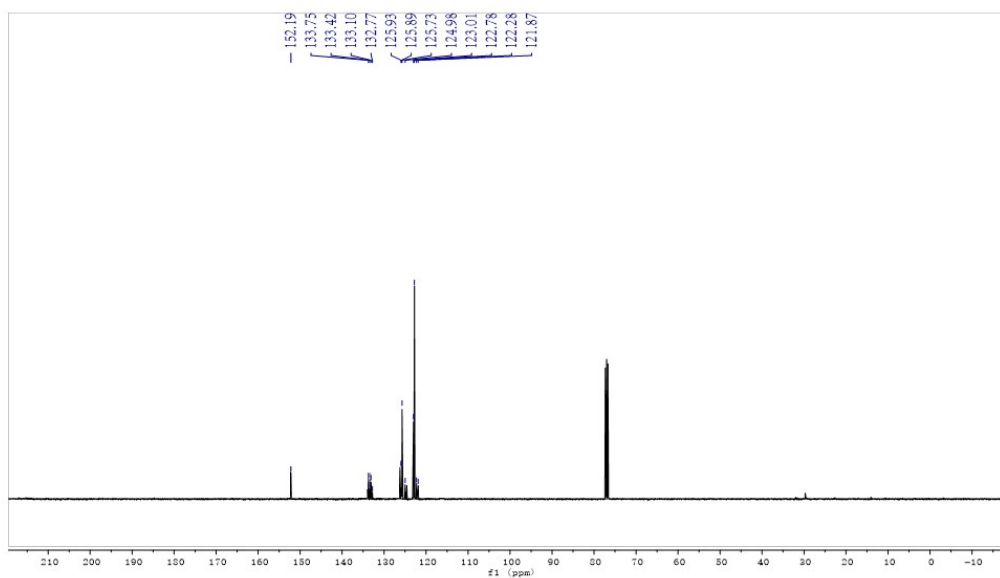

$^{13}\text{C}$  NMR spectrum of (*E*)-1,2-bis(4-(trifluoromethyl)phenyl)diazene recorded in  $\text{CDCl}_3$ ,  $\delta$  152.19, 133.75-132.77 (q,  $J=32.7$  Hz), 125.93-125.89(d,  $J=4.0$  Hz), 125.73-122.28(d,  $J=345$  Hz)121.873.



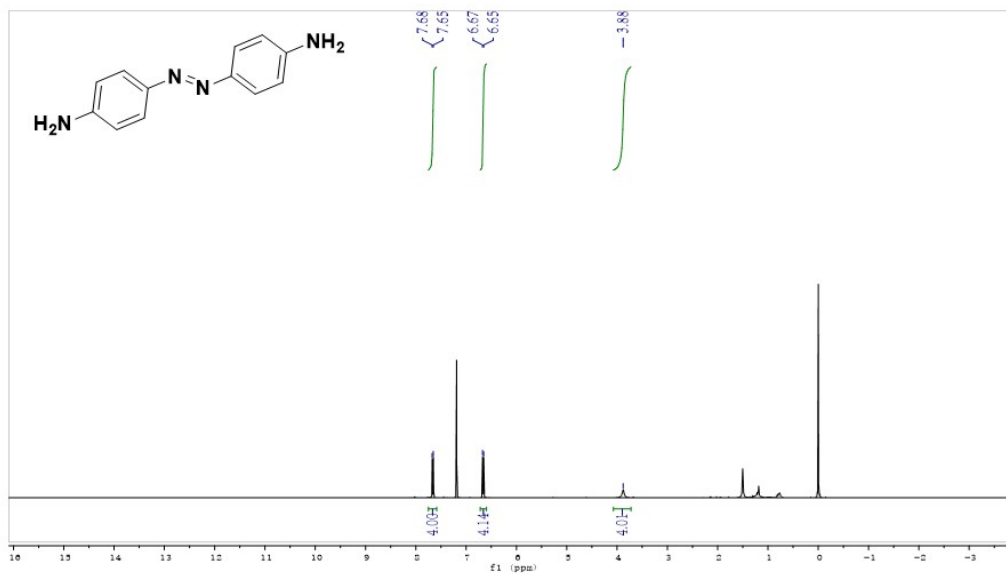

$^1\text{H}$  NMR spectrum of (*E*)-4,4'-(diazene-1,2-diyl)dianiline recorded in  $\text{CDCl}_3$ ,  $\delta$  7.68-7.65 (d,  $J=8$  Hz, 4H), 6.67-6.65 (d,  $J=8$  Hz, 4H), 3.88 (s, 4H).

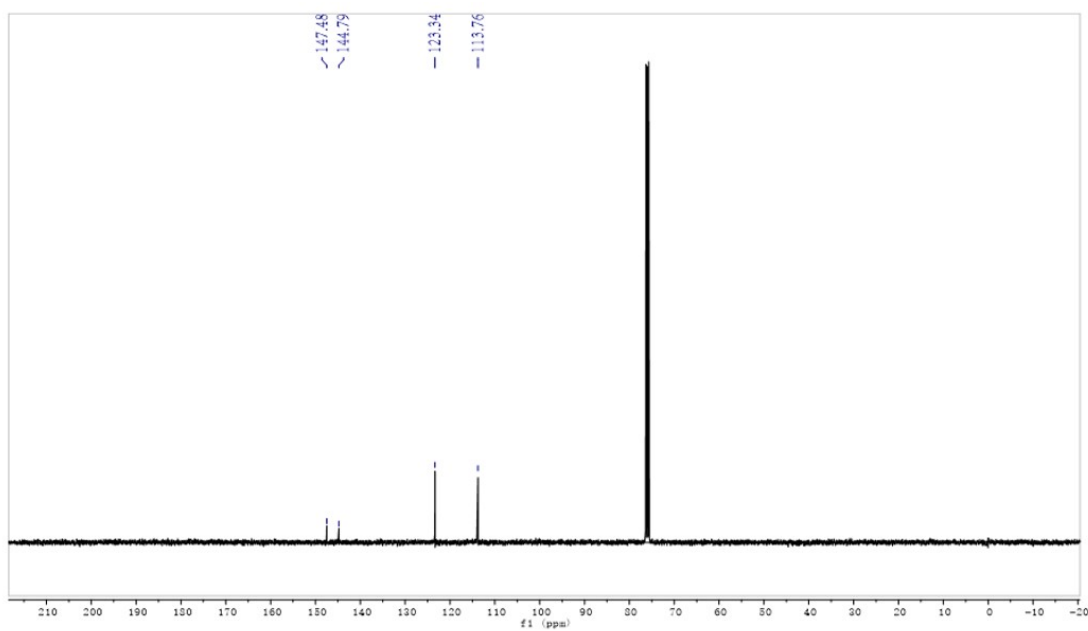

$^{13}\text{C}$  NMR spectrum of (*E*)-4,4'-(diazene-1,2-diyl)dianiline recorded in  $\text{CDCl}_3$ ,  $\delta$  147.48, 144.79, 123.34, 113.76.

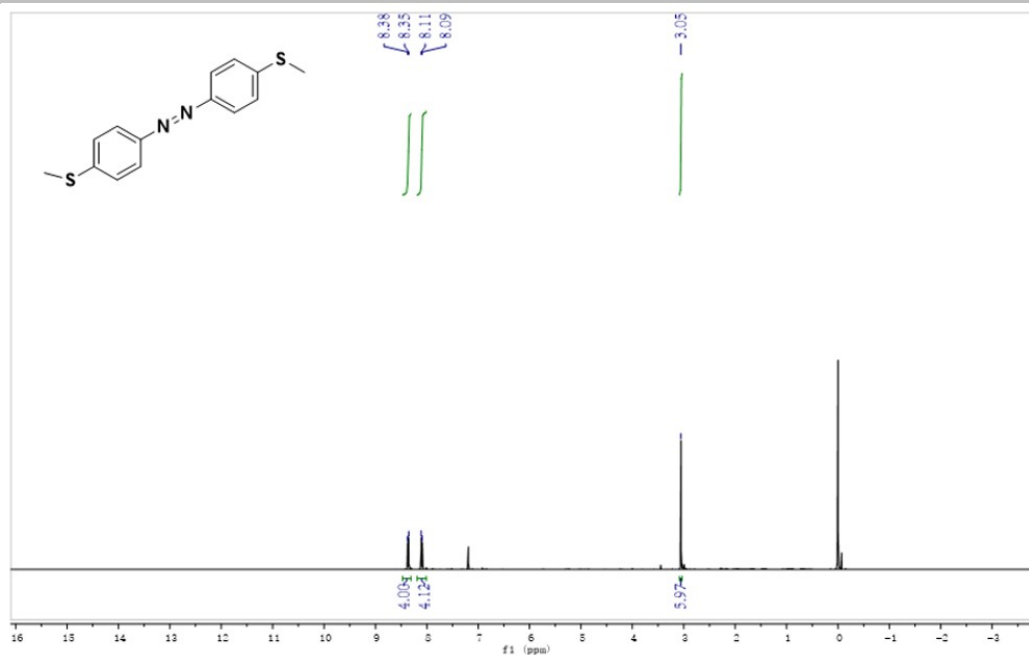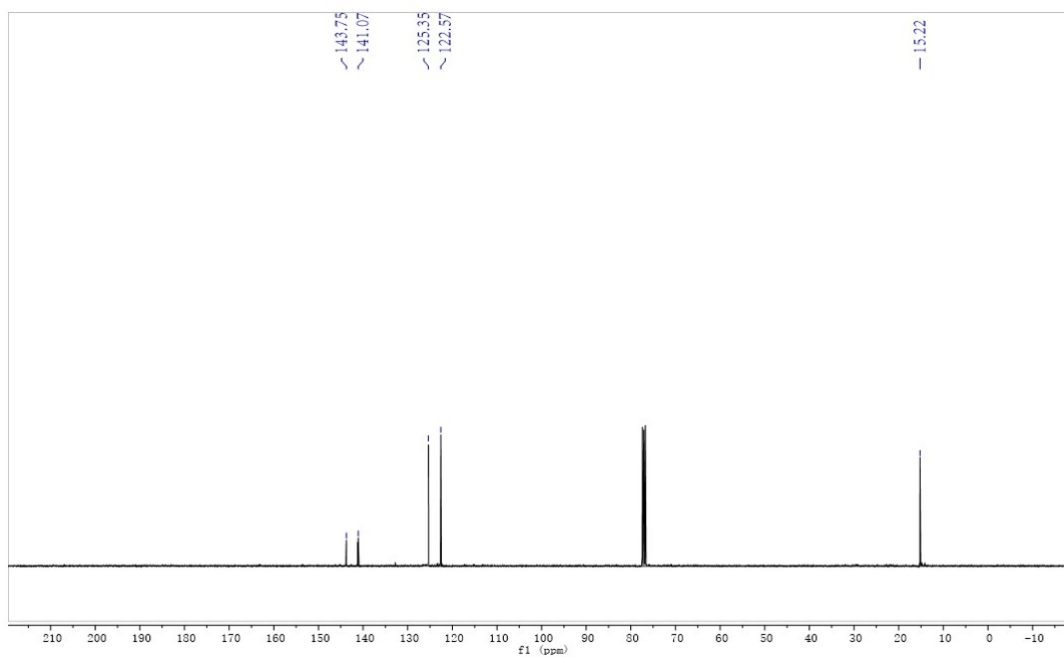

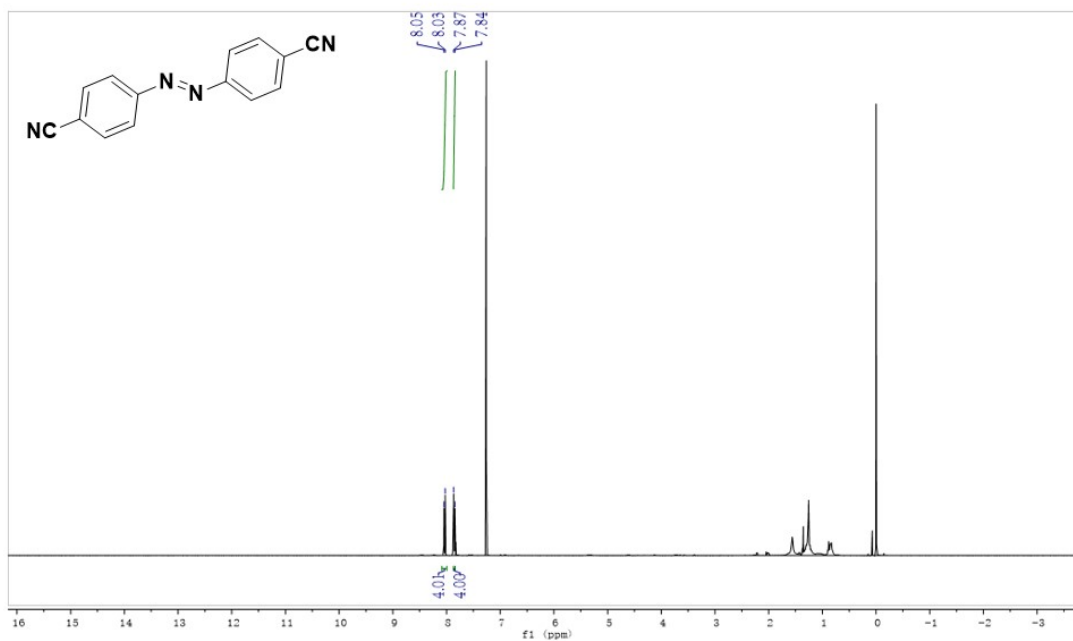

$^1\text{H}$  NMR spectrum of (*E*)-4,4'-(diazene-1,2-diyl)dibenzonitrile recorded in  $\text{CDCl}_3$ ,  $\delta$  8.05-8.03 (d,  $J=8$  Hz, 4H), 7.87-7.84(d,  $J=8$  Hz, 4H).

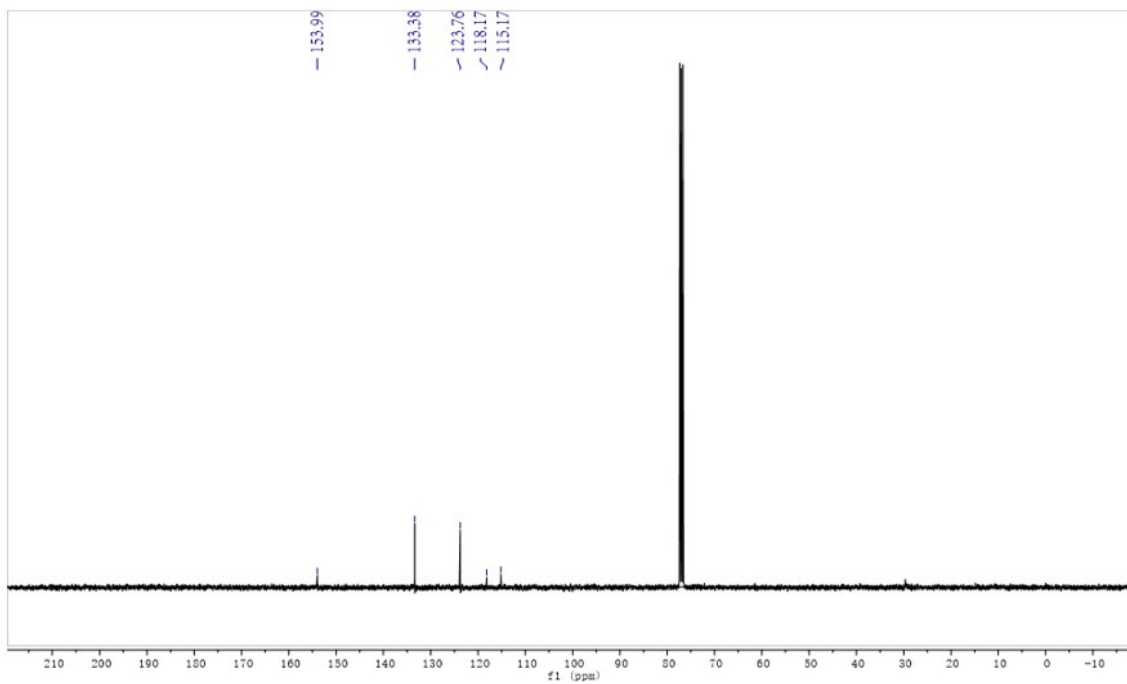

$^{13}\text{C}$  NMR spectrum of (*E*)-4,4'-(diazene-1,2-diyl)dibenzonitrile recorded in  $\text{CDCl}_3$ ,  $\delta$  153.99, 133.38, 123.76, 118.17, 115.17.

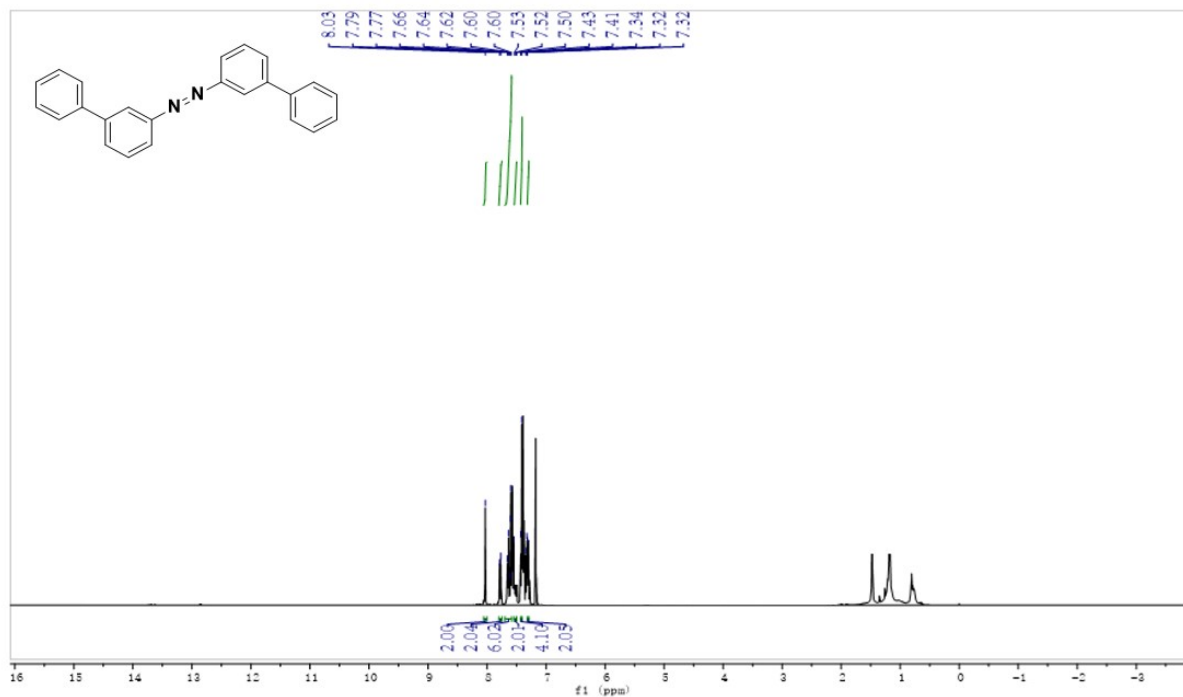

<sup>1</sup>H NMR spectrum of (*E*) - 1,2-bis([1,1'-biphenyl]-3-yl)diazene recorded in CDCl<sub>3</sub>, δ 8.03 (s, 2H), 7.79-7.77(m, 2H), 7.66-7.60(m, 6H), 7.53-7.50(t,2H), 7.43-7.41(m,4H), 7.34-7.32(t, 2H).

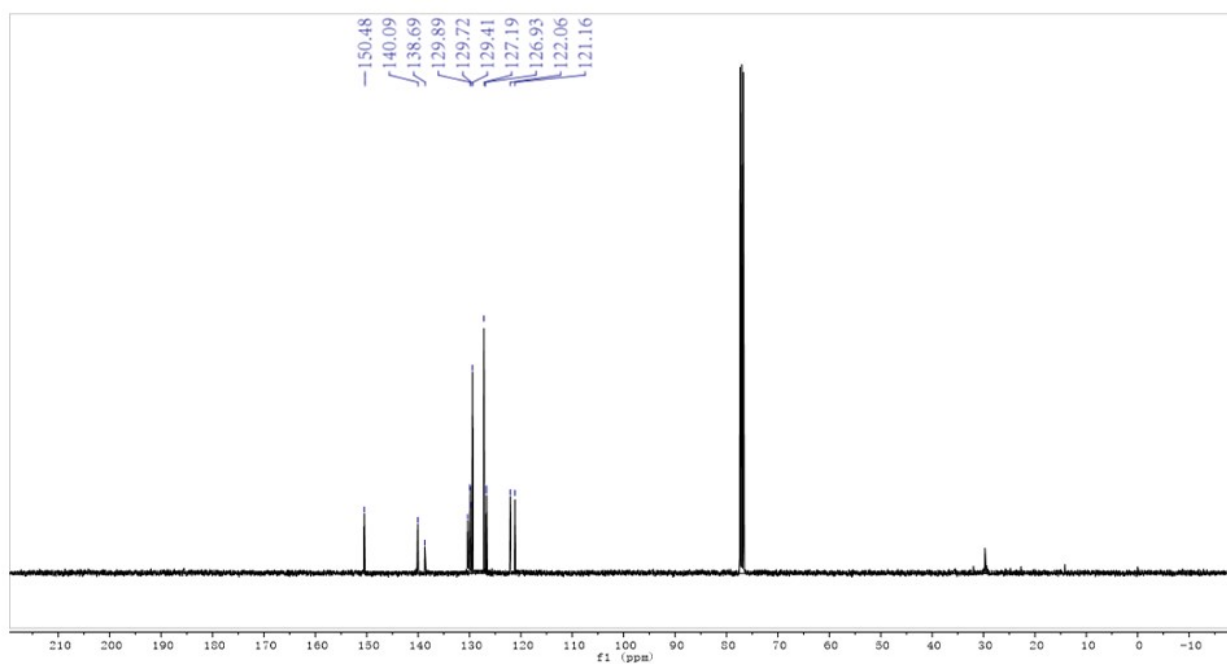

<sup>13</sup>C NMR spectrum of (*E*) - 1,2-bis([1,1'-biphenyl]-3-yl)diazene recorded in CDCl<sub>3</sub>, δ 150.48, 140.09, 138.69, 129.89, 129.72, 129.41, 127.19, 126.93, 122.06, 121.16.

---

## References

- [1] S.-i. Naya, T. Niwa, T. Kume, H. Tada, **2014**, *53*, 7305-7309.
- [2] X. Guo, C. Hao, G. Jin, H. Y. Zhu, X. Y. Guo, *Angew Chem Int Ed Engl* **2014**, *53*, 1973-1977.
- [3] Y. Dai, C. Li, Y. Shen, T. Lim, J. Xu, Y. Li, H. Niemantsverdriet, F. Besenbacher, N. Lock, R. Su, *Nature communications* **2018**, *9*, 60.
- [4] J. Li, S. Song, Y. Long, L. Wu, X. Wang, Y. Xing, R. Jin, X. Liu, H. Zhang, *Adv Mater* **2018**, *30*.
- [5] B. Mondal, P. S. Mukherjee, *Journal of the American Chemical Society* **2018**, *140*, 12592-12601.
- [6] Y.-F. Zhang, M. Mellah, *ACS Catalysis* **2017**, *7*, 8480-8486.
- [7] Z. Liu, Y. Huang, Q. Xiao, H. Zhu, *Green Chemistry* **2016**, *18*, 817-825.
